# Supplementary material for: Bacteriome of Moist Smokeless Tobacco Products Consumed in India With Emphasis on the Predictive Functional Potential
Source: Front Microbiol. 2021 Dec 24;12:784841. doi: 10.3389/fmicb.2021.784841 (PMC8740325; doi:10.3389/fmicb.2021.784841)
Supplement: Supplementary Table 6 — KEGG orthology (KO) terms. [file Table_6.xlsx]

## Sheet: functionalprof_picrust_category
#NAME	K1	K2	K3	MS1	MS2	MS3	Q1	Q2	Q3	S1	S2
K00001	15824	8095	5999	2481	11513	2559	10901	11574	12732	2529	4664
K00002	395	424	222	236	820	168	947	836	975	132	804
K00003	3367	4711	4483	949	4901	1050	4395	4996	5074	1031	1410
K00004	0	0	0	0	0	0	0	0	0	0	0
K00005	43	35	11	14	46	10	46	48	65	7	5
K00007	0	0	0	0	0	0	0	0	0	0	0
K00008	1045	863	429	392	2173	408	1700	2245	2061	437	1259
K00009	0	0	0	0	0	0	0	0	0	0	0
K00010	60	68	41	34	189	36	150	188	154	12	195
K00011	65	53	39	34	169	32	173	184	87	7	184
K00012	4298	5729	4926	1455	6563	1562	6780	6530	7554	1420	3379
K00013	4023	5346	4796	1306	6202	1352	5884	6269	6405	1231	2504
K00014	3995	5237	4761	1249	5904	1281	5665	5971	6053	1207	1692
K00015	1026	772	376	330	1750	340	1456	1810	1781	405	163
K00016	274	318	137	154	761	170	746	798	742	92	1304
K00018	132	119	29	24	126	28	140	136	131	28	14
K00019	30	18	3	6	20	4	23	21	36	4	3
K00020	4533	1315	620	566	2800	602	2413	2816	2986	720	452
K00021	5967	4536	4361	916	4045	976	4079	4016	4780	907	1106
K00022	72	40	18	15	70	14	68	78	96	10	10
K00023	64	48	30	24	90	13	108	98	64	5	2
K00024	1438	1150	565	490	2471	473	2201	2561	2236	530	300
K00025	336	353	190	216	709	147	801	716	855	104	694
K00026	1641	1454	712	698	3310	663	3090	3381	3202	589	2155
K00027	1318	1086	498	469	2012	542	2163	1960	2703	670	218
K00028	8	1	1	1	5	2	5	4	11	2	1
K00029	777	724	370	381	1543	337	1715	1542	1488	277	1211
K00030	989	796	379	357	1552	409	1671	1493	2087	424	343
K00031	3222	2884	1380	1353	5857	1301	5973	5862	6696	1275	3081
K00032	0	0	0	0	0	0	0	0	0	0	0
K00033	446	567	241	246	1188	270	1137	1213	1378	270	1707
K00034	347	382	146	168	845	203	833	895	933	133	1322
K00035	0	0	0	0	0	0	0	0	0	0	0
K00036	436	559	240	247	1184	271	1136	1216	1366	274	1707
K00037	0	0	0	0	0	0	0	0	0	0	0
K00038	0	0	0	0	0	0	0	0	0	0	0
K00039	0	0	0	0	0	0	0	0	0	0	0
K00040	26	24	11	16	96	22	82	104	50	4	184
K00041	146	128	70	67	264	58	348	287	115	1	1
K00042	68	56	36	26	118	16	123	124	89	6	4
K00043	0	0	0	0	0	0	0	0	0	0	0
K00044	0	0	0	1	1	0	0	1	1	0	0
K00045	0	0	0	0	0	0	0	0	0	0	0
K00046	759	826	414	437	1728	370	1933	1797	1745	217	1920
K00048	0	0	0	0	0	0	0	0	0	0	0
K00049	0	0	0	0	0	0	0	0	0	0	0
K00050	4413	1276	577	527	2724	568	2337	2734	2986	584	1148
K00051	0	0	0	0	0	0	0	0	0	0	0
K00052	4952	6091	5156	1644	7613	1730	7439	7607	8394	1639	2660
K00053	4204	5513	4860	1385	6438	1422	6181	6501	6744	1328	2535
K00054	4943	1558	760	671	3299	733	3005	3234	3900	780	328
K00055	22	18	2	4	14	2	17	16	24	2	2
K00057	966	1023	469	483	2025	449	2203	2040	2090	368	1969
K00058	8452	6828	5444	1976	9063	2015	8951	9095	9611	1744	4917
K00059	11423	11457	9905	2985	14041	2964	13446	14444	13416	2483	7920
K00060	205	254	109	104	503	113	509	521	614	88	751
K00064	4	10	7	2	24	2	14	22	23	1	2
K00065	166	229	100	100	454	101	474	469	560	76	748
K00066	0	0	0	0	0	0	0	0	0	0	0
K00067	6708	5377	4725	1276	5805	1377	5880	5777	6495	1225	3201
K00068	30	18	3	6	20	4	22	19	36	4	3
K00071	0	0	0	0	0	0	0	0	0	0	0
K00073	0	0	0	0	1	0	0	2	0	0	0
K00074	1115	1054	480	504	2071	468	2294	2094	2173	420	1554
K00075	953	1025	459	483	2069	461	2208	2079	2123	370	2155
K00076	65	90	18	14	82	16	86	80	78	16	8
K00077	4068	1061	464	413	1882	440	1993	1898	1940	453	436
K00078	0	0	0	0	0	0	0	0	0	0	0
K00079	0	0	0	0	0	0	0	0	0	0	0
K00082	6407	4731	4471	948	4730	1048	4258	4726	5121	1027	428
K00083	0	0	0	0	0	0	0	0	0	0	0
K00084	0	0	0	0	0	0	0	0	0	0	0
K00086	0	0	0	0	0	0	0	0	0	0	0
K00087	458	560	252	289	1082	244	1178	1079	1443	200	1451
K00088	3088	4538	4397	938	4665	935	4220	4825	4297	759	2344
K00090	0	0	0	0	0	0	0	0	0	0	0
K00091	541	526	274	304	1088	244	1209	1117	1103	214	715
K00093	0	0	0	0	0	0	0	0	0	0	0
K00094	0	0	0	0	0	0	0	0	0	0	0
K00095	0	0	0	0	0	0	0	0	0	0	0
K00096	6536	4814	4514	1002	4912	1113	4483	4920	5400	1121	447
K00097	1009	1062	481	503	2130	471	2298	2151	2162	374	2154
K00098	0	0	0	0	0	0	0	0	0	0	0
K00099	931	1002	460	474	1939	424	2095	1996	2026	361	1778
K00100	4884	6523	5286	1938	8401	1897	8779	8594	8852	1479	6729
K00101	9	0	0	1	5	0	1	5	3	0	0
K00102	1387	1162	528	509	2052	564	2297	1970	2869	658	228
K00103	0	0	0	0	0	0	0	0	0	0	0
K00104	1606	1492	662	620	2698	682	2894	2664	3497	787	1091
K00105	0	0	0	0	0	0	0	0	0	0	0
K00106	0	0	0	0	0	0	0	0	0	0	0
K00108	0	0	0	0	0	0	0	0	0	0	0
K00109	4	9	7	2	24	2	14	21	23	1	2
K00111	4246	1246	574	572	2339	548	2513	2346	2610	524	1118
K00112	49	27	6	9	33	7	36	31	45	6	4
K00113	49	27	6	9	33	7	36	31	45	6	4
K00114	176	245	94	114	569	133	546	590	618	81	1116
K00115	0	0	0	0	0	0	0	0	0	0	0
K00116	69	61	23	31	144	31	131	154	119	11	189
K00117	480	513	250	255	1218	273	1225	1275	1008	201	1322
K00118	0	0	0	0	0	0	0	0	0	0	0
K00119	8	1	1	1	5	2	5	4	11	2	1
K00120	311	332	166	204	639	141	725	642	833	105	695
K00121	131	120	59	62	353	67	281	364	279	24	383
K00122	0	0	0	0	0	0	0	0	0	0	0
K00123	7023	5468	4778	1272	6076	1488	5959	6016	7247	1495	2354
K00124	5476	4033	4136	644	3239	776	2998	3190	3602	764	286
K00125	1150	2838	3600	162	985	197	736	1056	628	95	47
K00126	0	0	0	0	0	0	0	0	0	0	0
K00127	280	256	111	112	460	126	460	462	533	218	53
K00128	2315	2458	1130	1220	4832	1071	5305	4907	5295	821	4924
K00129	22	18	9	10	32	8	29	34	41	5	3
K00130	1158	948	432	416	1714	464	1895	1642	2396	524	187
K00131	3909	1031	433	467	1839	455	1958	1795	2474	437	1536
K00132	0	0	0	0	0	0	0	0	0	0	0
K00133	4108	5402	4814	1324	6281	1378	5999	6357	6521	1265	2514
K00134	1174	1219	560	564	2517	550	2701	2511	2493	421	2649
K00135	3497	2928	1425	1361	6151	1422	6176	6081	7233	1410	2567
K00136	0	0	0	0	0	0	0	0	0	0	0
K00137	0	0	0	0	0	0	0	0	0	0	0
K00138	6	6	1	3	12	4	18	23	18	1	2
K00139	0	0	0	0	0	0	0	0	0	0	0
K00140	8	1	1	2	5	2	5	4	11	2	1
K00141	0	0	0	0	0	0	0	0	0	0	0
K00145	6022	7247	5672	2172	9881	2233	9940	9925	10734	2058	4929
K00146	0	0	0	0	1	0	0	2	0	0	0
K00147	627	679	301	282	1314	290	1386	1373	1234	257	1085
K00148	30	18	3	6	20	4	22	19	35	4	3
K00150	6464	4759	4494	967	4838	1071	4388	4859	5262	1053	536
K00151	353	394	194	218	744	157	856	753	936	128	804
K00152	0	0	0	0	0	0	0	0	0	0	0
K00153	0	0	0	0	0	0	0	0	0	0	0
K00154	0	0	0	0	0	0	0	0	0	0	0
K00155	353	355	169	216	720	158	800	728	878	108	879
K00156	16	8	1	4	15	4	21	27	23	1	2
K00157	0	0	0	0	0	0	0	0	0	0	0
K00158	0	0	0	0	0	0	0	0	0	0	0
K00161	1069	1120	499	506	2168	476	2346	2184	2303	396	1985
K00162	1010	1065	486	490	2044	441	2284	2066	2162	289	1964
K00163	26	24	11	16	96	22	82	104	50	4	184
K00164	634	637	336	351	1409	298	1596	1414	1299	150	1368
K00166	69	62	20	20	87	24	118	93	143	29	13
K00167	162	242	89	94	444	110	477	455	625	98	758
K00169	9725	5384	4638	1158	5318	1335	5258	5243	6367	1414	1229
K00170	9734	5391	4638	1160	5323	1336	5262	5251	6372	1417	1230
K00171	9242	4830	4433	955	4373	1101	4321	4288	5222	1103	422
K00172	9511	5189	4561	1082	5014	1249	4923	4941	5966	1300	1197
K00174	6703	5182	4640	1150	5790	1286	5294	5896	5801	1281	2451
K00175	6613	5105	4598	1117	5595	1240	5147	5700	5638	1168	2431
K00176	1641	3347	3801	368	1918	434	1666	2000	1775	412	854
K00177	1479	3198	3737	295	1694	366	1385	1783	1461	317	826
K00178	0	0	0	0	0	0	0	0	0	0	0
K00179	6630	4960	4565	1056	4920	1244	4890	4825	5974	1292	473
K00180	5679	4198	4205	720	3484	859	3320	3461	3960	874	318
K00183	164	238	84	94	423	109	464	428	612	101	757
K00184	934	918	456	469	1901	438	2116	1900	1898	389	1425
K00185	727	720	378	386	1606	347	1748	1617	1473	263	1390
K00186	996	791	371	342	1488	398	1622	1434	2080	429	160
K00187	996	791	371	342	1488	398	1622	1434	2080	429	160
K00188	220	201	78	80	316	90	353	325	419	116	34
K00189	3276	320	128	107	556	140	509	512	732	136	60
K00190	0	0	0	0	0	0	0	0	0	0	0
K00191	8	4	0	2	2	0	4	8	3	2	1
K00192	950	759	360	336	1432	384	1570	1364	2012	416	155
K00193	950	759	360	336	1432	384	1570	1364	2012	416	155
K00194	1082	961	432	419	1812	474	1956	1754	2533	492	904
K00195	950	759	360	336	1432	384	1570	1364	2012	416	155
K00196	124	198	72	81	377	90	382	383	518	73	748
K00197	1082	961	432	419	1812	474	1956	1754	2533	492	904
K00198	2052	1739	800	755	3284	867	3552	3153	4586	916	1060
K00200	2126	3620	3970	514	2514	602	2389	2524	2690	516	386
K00201	3051	4358	4320	835	3854	965	3878	3786	4652	928	357
K00202	3076	4382	4330	852	3949	986	3960	3889	4702	932	541
K00203	3050	4356	4320	834	3850	965	3876	3784	4652	928	357
K00204	0	0	0	0	0	0	0	0	0	0	0
K00205	2087	3594	3956	496	2415	580	2300	2416	2633	510	202
K00206	0	0	0	0	0	0	0	0	0	0	0
K00207	8	1	1	2	5	2	5	4	11	2	1
K00208	1005	1063	489	513	2210	490	2358	2229	2186	374	2335
K00209	0	0	0	0	0	0	0	0	0	0	0
K00210	130	147	42	46	230	53	232	251	209	30	201
K00211	0	0	0	0	0	0	0	0	0	0	0
K00212	0	0	0	0	0	0	0	0	0	0	0
K00213	0	0	0	0	0	0	0	0	0	0	0
K00214	22	18	9	10	31	7	29	33	41	5	3
K00215	6554	5135	4631	1186	5342	1262	5405	5322	5859	1118	2446
K00216	0	0	0	0	0	0	0	0	0	0	0
K00217	0	0	0	0	0	0	0	0	0	0	0
K00218	22	18	9	10	31	8	29	33	41	5	3
K00219	361	394	195	219	748	159	861	757	945	130	805
K00220	0	0	0	0	0	0	0	0	0	0	0
K00221	0	0	0	0	0	0	0	0	0	0	0
K00222	0	0	0	0	0	0	0	0	0	0	0
K00223	0	0	0	0	0	0	0	0	0	0	0
K00224	0	0	0	0	1	0	0	2	0	0	0
K00226	7994	6114	5176	1635	8140	1712	7370	8253	8253	1547	3036
K00227	0	0	0	0	0	0	0	0	0	0	0
K00228	915	935	484	535	1925	415	2224	1929	2057	250	1877
K00230	12	10	8	4	26	4	18	21	32	3	4
K00231	503	476	244	276	1023	226	1072	1045	1108	236	902
K00232	64	80	38	24	138	24	160	146	143	28	112
K00239	3127	4620	4445	987	4804	984	4398	4946	4466	839	2358
K00240	2042	1870	864	837	3898	802	3746	3968	3916	759	2320
K00241	3141	4646	4451	993	4835	996	4456	4972	4527	860	2363
K00242	947	774	372	335	1829	336	1475	1898	1886	347	880
K00243	552	550	274	295	1055	226	1255	1086	1102	146	809
K00244	65	90	18	14	82	16	86	80	78	16	8
K00245	317	353	106	102	426	108	478	420	512	136	47
K00246	0	0	0	0	0	0	0	0	0	0	0
K00247	0	0	0	0	0	0	0	0	0	0	0
K00248	613	600	272	317	1112	271	1216	1139	1394	324	751
K00249	2289	3910	4045	716	2802	634	2906	2905	3169	508	1515
K00252	584	593	294	318	1234	267	1431	1226	1223	146	1185
K00253	6	6	1	3	12	4	18	23	18	1	2
K00254	0	0	0	0	0	0	0	0	0	0	0
K00255	0	0	0	0	0	0	0	0	0	0	0
K00256	0	0	0	0	0	0	0	0	0	0	0
K00257	3668	5265	4706	1380	5523	1276	5956	5579	5801	1091	3280
K00258	788	836	419	478	1617	348	1899	1648	1845	230	1496
K00259	2044	1875	933	947	3795	893	4190	3746	4437	812	2348
K00260	14	10	3	4	13	5	18	15	25	6	3
K00261	6350	4930	4558	1064	5167	1067	4746	5309	5132	967	1966
K00262	777	714	361	381	1507	328	1723	1518	1450	187	1383
K00263	478	594	268	298	1124	248	1241	1139	1455	202	1552
K00264	0	0	0	0	1	0	0	2	0	0	0
K00265	5176	6565	5338	1860	8145	1922	8533	8160	9043	1842	3709
K00266	11608	7003	5459	1915	8772	2124	9015	8698	9951	2036	3042
K00270	0	0	0	0	0	0	0	0	0	0	0
K00271	0	0	0	0	0	0	0	0	0	0	0
K00272	0	0	0	0	0	0	0	0	0	0	0
K00273	0	1	0	0	1	0	0	0	1	0	0
K00274	210	176	107	96	372	76	467	406	196	9	4
K00275	644	639	337	349	1358	289	1561	1359	1313	157	1189
K00276	0	0	0	0	0	0	0	0	0	0	0
K00278	862	884	382	358	1635	378	1736	1686	1642	377	1119
K00279	0	0	0	0	0	0	0	0	0	0	0
K00280	0	0	0	0	0	0	0	0	0	0	0
K00281	288	266	148	124	526	104	648	568	363	44	118
K00282	3537	625	239	230	1152	284	1127	1127	1475	251	1008
K00283	4120	1203	539	559	2440	575	2532	2399	2702	476	2099
K00284	338	363	183	222	756	165	820	762	904	110	882
K00285	30	32	18	18	120	24	96	124	73	5	186
K00286	1200	1268	568	587	2468	570	2690	2491	2632	504	2193
K00287	1149	1115	567	626	2316	501	2698	2349	2267	270	2066
K00288	708	790	369	417	1676	371	1837	1735	1729	216	2106
K00290	172	144	74	75	289	66	382	314	158	12	6
K00292	353	396	195	218	746	158	857	755	937	129	804
K00293	94	99	41	30	157	28	183	165	178	32	115
K00294	617	632	311	330	1297	291	1523	1296	1321	172	1194
K00295	0	0	0	0	0	0	0	0	0	0	0
K00296	0	0	0	0	0	0	0	0	0	0	0
K00297	808	794	393	402	1618	343	1844	1641	1501	190	1384
K00298	0	0	0	0	0	0	0	0	0	0	0
K00299	828	566	317	264	1474	240	1095	1533	1312	250	122
K00300	26	24	11	16	96	22	82	104	50	4	184
K00301	60	51	21	25	144	28	120	148	111	9	190
K00302	3290	340	132	108	594	148	531	551	770	144	61
K00303	3492	524	211	189	893	230	862	844	1166	252	96
K00304	0	0	0	0	0	0	0	0	0	0	0
K00305	0	0	0	0	0	0	0	0	0	0	0
K00306	0	0	0	0	0	0	0	0	0	0	0
K00308	0	0	0	0	0	0	0	0	0	0	0
K00309	38	20	4	7	24	5	28	23	46	5	5
K00311	74	40	9	13	42	9	51	44	78	9	7
K00313	251	226	83	92	332	99	412	337	480	133	40
K00314	0	0	0	0	0	0	0	0	0	0	0
K00315	0	0	0	0	0	0	0	0	0	0	0
K00316	0	0	0	0	0	0	0	0	0	0	0
K00317	0	0	0	0	0	0	0	0	0	0	0
K00318	779	752	391	402	1664	360	1801	1668	1559	272	1397
K00319	2087	3594	3956	496	2415	580	2300	2416	2633	510	202
K00320	2134	3626	3969	508	2464	587	2344	2462	2698	516	208
K00321	0	0	0	0	0	0	0	0	0	0	0
K00322	83	71	38	34	186	43	136	194	151	108	19
K00324	175	170	96	78	378	72	395	406	320	46	303
K00325	89	71	48	45	204	40	203	221	131	12	187
K00326	22	18	2	5	14	2	17	16	25	2	2
K00327	0	0	0	0	0	0	0	0	0	0	0
K00329	4620	3453	3815	367	2003	442	1718	2049	1956	322	864
K00330	2978	2644	1233	1209	5460	1230	5433	5467	6192	1204	3100
K00331	7360	5792	4952	1474	6986	1562	6655	7020	7529	1428	3205
K00332	4779	1648	801	765	3595	741	3317	3668	3733	695	1832
K00333	7359	5826	4965	1467	6897	1531	6577	6975	7446	1419	2831
K00334	788	987	404	392	1864	426	1914	1921	2081	371	2286
K00335	848	1024	417	409	1919	438	1970	1976	2168	381	2294
K00336	489	543	235	220	1015	229	1083	1062	950	211	783
K00337	7422	5830	4984	1496	7076	1577	6762	7116	7579	1434	3206
K00338	6480	5110	4615	1146	5520	1159	5071	5665	5509	1021	2682
K00339	2677	2275	1084	1046	4756	1049	4702	4764	5320	1026	2144
K00340	3020	2675	1261	1228	5535	1241	5524	5550	6231	1207	3100
K00341	4210	5594	4858	1396	6565	1451	6284	6636	6944	1319	3160
K00342	3147	2798	1323	1274	5816	1305	5728	5831	6484	1329	3126
K00343	4089	5456	4811	1346	6287	1387	5992	6405	6723	1295	2772
K00344	1114	1118	527	539	2224	471	2406	2297	2318	382	2077
K00346	653	631	312	343	1362	300	1555	1362	1307	167	1374
K00347	656	633	313	344	1364	301	1557	1367	1308	167	1374
K00348	580	654	289	330	1278	286	1391	1303	1582	226	1743
K00349	656	633	313	344	1364	301	1557	1367	1308	167	1374
K00350	456	456	217	249	901	196	1009	920	1064	153	995
K00351	456	456	217	249	901	196	1009	920	1064	153	995
K00353	0	0	0	0	0	0	0	0	0	0	0
K00354	0	0	0	0	0	0	0	0	0	0	0
K00355	0	0	0	1	1	0	0	1	1	0	0
K00356	3538	663	236	241	1150	279	1122	1134	1461	235	1011
K00358	1378	1245	572	568	2261	557	2514	2201	3030	561	967
K00359	385	433	166	183	812	207	846	843	1022	196	971
K00360	4	9	7	2	20	2	13	17	21	1	2
K00362	118	100	57	52	306	62	284	331	182	21	370
K00363	982	830	409	368	2055	374	1664	2140	1962	350	1344
K00364	0	0	0	0	0	0	0	0	0	0	0
K00365	22	18	2	4	14	2	17	16	24	2	2
K00366	1074	784	398	353	1794	325	1455	1847	1752	362	159
K00367	22	18	9	10	31	8	29	33	41	5	3
K00368	80	86	40	27	146	26	170	158	158	32	114
K00369	0	0	0	0	0	0	0	0	0	0	0
K00370	300	305	100	102	392	112	478	393	530	150	48
K00371	433	504	173	185	774	203	865	780	1058	225	797
K00372	98	72	42	41	191	36	196	206	125	11	187
K00373	40	38	12	12	46	19	82	46	92	28	8
K00374	200	182	73	78	275	82	324	272	381	110	33
K00375	284	250	148	131	620	133	654	660	352	114	203
K00376	106	111	66	42	216	35	252	234	184	32	112
K00378	197	150	68	59	314	76	264	328	310	144	32
K00380	54	32	28	21	77	12	93	86	43	3	0
K00381	1346	1109	592	571	2638	489	2434	2750	2410	387	1290
K00382	7274	5872	4991	1555	6823	1586	7138	6813	7399	1323	3759
K00383	1036	858	408	370	1603	416	1760	1544	2198	450	270
K00384	8307	6597	5391	1911	8773	1960	8638	8820	9176	1779	4285
K00385	0	0	0	0	0	0	0	0	0	0	0
K00386	68	70	20	22	92	36	164	110	172	48	14
K00387	0	0	0	0	0	0	0	0	0	0	0
K00389	220	301	119	118	548	122	576	570	707	108	864
K00390	7259	5638	4936	1419	6769	1496	6454	6789	7170	1378	2665
K00391	0	0	0	0	0	0	0	0	0	0	0
K00392	569	584	294	326	1227	265	1394	1275	1185	143	1176
K00394	320	374	143	158	643	167	695	650	878	180	779
K00395	195	176	70	77	265	77	311	267	360	107	31
K00397	0	0	0	0	0	0	0	0	0	0	0
K00399	2087	3594	3956	496	2415	580	2300	2416	2633	510	202
K00400	3050	4356	4320	834	3850	965	3876	3784	4652	928	357
K00401	2087	3594	3956	496	2415	580	2300	2416	2633	510	202
K00402	2087	3594	3956	496	2415	580	2300	2416	2633	510	202
K00404	374	371	187	146	649	124	794	697	439	57	124
K00405	889	954	489	477	1966	415	2243	2001	1990	258	2045
K00406	801	870	428	442	1846	408	2011	1851	1889	324	1948
K00407	0	0	0	0	0	0	0	0	0	0	0
K00411	800	590	295	242	1430	232	1038	1478	1274	254	124
K00412	170	188	67	61	364	80	302	374	277	128	212
K00413	65	90	18	14	82	16	86	80	78	16	8
K00421	60	40	4	13	37	6	44	44	64	8	6
K00423	0	0	0	0	0	0	0	0	0	0	0
K00425	1076	961	411	415	1647	420	1839	1699	1723	481	326
K00426	515	443	201	188	858	189	916	922	648	166	234
K00427	0	0	0	0	0	0	0	0	0	0	0
K00428	1820	2000	938	1045	4091	907	4490	4156	4365	634	4644
K00429	0	0	0	0	0	0	0	0	0	0	0
K00430	338	359	177	226	796	176	860	812	890	108	1060
K00432	837	803	396	402	1717	374	1878	1720	1615	310	1504
K00433	26	25	12	16	98	22	83	104	50	4	184
K00435	0	2	2	0	3	1	1	2	2	0	0
K00436	30	18	3	6	20	4	22	19	35	4	3
K00437	54	46	14	4	82	18	56	86	88	20	4
K00438	951	759	360	336	1434	384	1570	1365	2012	417	155
K00440	1	0	0	0	1	0	0	2	0	0	0
K00441	3144	4424	4360	870	3979	988	4020	3921	4767	940	364
K00442	0	0	0	0	0	0	0	0	0	0	0
K00443	1137	2835	3596	160	982	196	730	1052	621	94	46
K00446	0	0	0	0	12	0	3	12	6	0	0
K00448	0	0	0	0	0	0	0	0	0	0	0
K00449	26	24	11	16	96	22	82	104	50	4	184
K00450	0	0	0	0	0	0	0	0	0	0	0
K00451	499	522	264	284	1011	215	1204	1042	1050	130	804
K00452	353	396	195	218	746	158	857	755	937	129	804
K00453	353	396	195	218	748	158	859	758	940	129	804
K00455	0	0	0	0	0	0	0	0	0	0	0
K00456	0	0	0	0	0	0	0	0	0	0	0
K00457	521	540	274	294	1042	223	1233	1075	1091	135	808
K00459	627	639	312	327	1222	266	1366	1252	1192	231	722
K00460	0	0	0	0	0	0	0	0	0	0	0
K00461	0	0	0	0	0	0	0	0	0	0	0
K00462	22	18	2	4	14	2	17	16	24	2	2
K00463	0	0	0	0	0	0	0	0	0	0	0
K00464	22	18	9	10	31	8	29	33	41	5	3
K00465	1	0	0	0	1	0	0	2	0	0	0
K00466	0	0	0	0	0	0	0	0	0	0	0
K00467	0	0	0	0	0	0	0	0	0	0	0
K00468	0	0	0	0	0	0	0	0	0	0	0
K00469	0	0	0	0	0	0	0	0	0	0	0
K00470	55	42	14	22	114	25	104	120	84	8	187
K00471	0	0	0	0	0	0	0	0	0	0	0
K00472	0	0	0	0	0	0	0	0	0	0	0
K00475	0	0	0	0	0	0	0	0	0	0	0
K00476	0	0	0	0	0	0	0	0	0	0	0
K00477	0	0	0	0	0	0	0	0	0	0	0
K00478	0	0	0	0	0	0	0	0	0	0	0
K00479	0	0	0	0	4	0	1	4	2	0	0
K00480	22	18	2	4	14	2	17	16	24	2	2
K00481	52	36	4	11	35	6	40	36	61	6	5
K00483	735	500	277	229	1360	217	956	1410	1203	238	115
K00484	0	0	0	0	0	0	0	0	0	0	0
K00485	0	0	0	0	0	0	0	0	0	0	0
K00486	353	396	195	218	746	158	857	755	937	129	804
K00491	0	0	0	0	0	0	0	0	0	0	0
K00492	0	0	0	0	4	0	1	4	2	0	0
K00493	79	60	22	29	94	23	98	108	135	15	12
K00494	61	43	15	22	120	26	110	124	96	9	189
K00495	30	18	3	6	20	4	22	19	35	4	3
K00496	353	394	194	218	744	157	856	753	936	128	804
K00499	0	0	0	0	0	0	0	0	0	0	0
K00500	354	396	195	218	746	158	858	755	938	129	804
K00504	0	0	0	0	1	0	0	2	0	0	0
K00505	0	0	0	0	0	0	0	0	0	0	0
K00507	1162	1245	611	678	2607	574	2815	2683	2785	437	2822
K00508	852	915	458	502	1754	372	2059	1795	1985	258	1608
K00510	22	18	9	10	31	9	29	33	41	5	3
K00511	0	0	0	0	0	0	0	0	0	0	0
K00514	48	41	20	26	128	29	111	137	91	9	187
K00515	0	0	0	0	0	0	0	0	0	0	0
K00517	132	107	50	56	234	50	208	243	231	24	200
K00518	10	1	1	0	3	0	1	3	2	1	0
K00519	0	0	0	0	0	0	0	0	0	0	0
K00520	596	650	287	274	1250	301	1302	1289	1435	357	1109
K00521	0	0	0	0	0	0	0	0	0	0	0
K00522	735	500	277	229	1348	217	953	1398	1197	238	115
K00523	0	0	0	1	1	0	0	1	1	0	0
K00524	0	0	0	0	0	0	0	0	0	0	0
K00525	4055	5369	4778	1282	6222	1340	5888	6312	6320	1184	2681
K00526	748	706	332	360	1425	306	1603	1420	1339	156	1275
K00527	6525	4906	4562	1017	5198	1129	4663	5230	5526	1123	1271
K00528	2590	1893	975	838	4426	890	3711	4470	4695	1032	413
K00529	78	49	16	16	71	11	66	69	103	10	10
K00530	0	0	0	0	0	0	0	0	0	0	0
K00531	0	0	0	0	0	0	0	0	0	0	0
K00532	8	4	0	2	2	0	4	8	3	2	1
K00533	8	4	0	2	2	0	4	8	3	2	1
K00534	8	4	0	2	2	0	4	8	3	2	1
K00535	1097	975	441	427	1842	482	1981	1781	2571	495	906
K00536	0	0	0	0	0	0	0	0	0	0	0
K00537	1636	1420	738	757	3281	639	3159	3333	3251	490	2174
K00538	0	0	0	0	0	0	0	0	0	0	0
K00539	0	0	0	0	0	0	0	0	0	0	0
K00540	11691	12880	8490	5137	22416	4739	22872	22883	22578	3644	16893
K00542	0	0	0	0	0	0	0	0	0	0	0
K00543	2	0	0	1	0	0	0	0	1	0	0
K00544	0	0	0	0	0	0	0	0	0	0	0
K00545	0	0	0	0	0	0	0	0	0	0	0
K00547	4	9	7	2	24	3	14	21	23	1	2
K00548	5631	2190	1135	1013	5086	963	4452	5165	4765	900	1691
K00549	6276	4809	4469	1039	4579	1099	4630	4583	5111	1010	1217
K00551	148	221	83	96	472	111	464	486	566	77	932
K00554	995	1055	487	502	2144	472	2299	2162	2162	373	2155
K00555	6162	4470	4374	852	4386	959	3869	4402	4686	911	387
K00556	132	143	73	54	370	75	380	335	307	42	492
K00557	22	18	9	10	31	8	29	33	41	5	3
K00558	6955	5514	4903	1413	6507	1364	6241	6622	6557	1183	3451
K00559	22	18	2	4	14	2	17	16	24	2	2
K00560	2749	4223	4272	838	3774	878	3853	3774	3938	675	1574
K00561	0	0	0	0	0	0	0	0	0	0	0
K00563	0	0	0	0	0	0	0	0	0	0	0
K00564	3	0	0	2	2	0	0	3	2	0	0
K00566	1805	1608	780	759	3622	718	3380	3704	3469	627	2460
K00567	7095	5436	4847	1344	6507	1426	6124	6534	6771	1268	2714
K00568	160	141	86	74	389	84	333	404	278	118	205
K00569	353	395	195	218	746	158	857	755	936	129	804
K00570	0	0	0	0	4	0	1	4	2	0	0
K00571	750	510	278	234	1363	221	976	1430	1218	241	118
K00573	6296	4902	4512	1076	4867	1168	4827	4852	5655	1112	2252
K00574	156	130	80	71	367	80	322	387	262	118	205
K00575	2087	2000	936	947	4041	973	4270	4062	4761	948	3061
K00577	3785	4856	4596	1062	5198	1182	4830	5182	5848	1166	472
K00578	951	759	360	336	1434	384	1570	1365	2012	417	155
K00579	951	759	360	336	1434	384	1570	1365	2012	417	155
K00580	951	759	360	336	1434	384	1570	1365	2012	417	155
K00581	951	759	360	336	1434	384	1570	1365	2012	417	155
K00582	951	759	360	336	1434	384	1570	1365	2012	417	155
K00583	950	759	360	336	1432	384	1570	1364	2012	416	155
K00584	6273	4647	4434	936	4360	1094	4346	4244	5327	1050	414
K00586	6349	4642	4444	927	4650	1036	4176	4661	5043	1016	417
K00587	0	0	0	0	0	0	0	0	0	0	0
K00588	31	21	11	11	37	8	31	38	47	5	3
K00590	1530	1040	566	476	2750	445	1961	2857	2474	487	238
K00594	0	0	0	0	0	0	0	0	0	0	0
K00595	1659	1159	633	539	3034	517	2194	3158	2752	612	266
K00596	0	0	0	0	0	0	0	0	0	0	0
K00598	26	27	16	13	52	10	42	51	62	6	6
K00599	17279	14504	9089	5646	23953	5752	25327	23590	29155	5328	12102
K00600	7392	5725	4938	1439	6827	1517	6522	6869	7265	1395	2578
K00601	180	240	86	104	497	115	488	510	606	81	935
K00602	4039	3707	1720	1704	7266	1741	7875	7187	8492	1608	4635
K00603	147	213	76	90	408	99	424	428	561	80	752
K00604	1854	1754	836	812	3871	779	3635	3946	3881	684	3018
K00605	4343	1390	624	638	2807	642	2938	2796	3034	527	2404
K00606	5114	1896	900	846	3986	833	3768	3997	4030	804	1620
K00607	23	25	13	15	101	21	84	108	52	4	184
K00608	2	2	0	0	2	0	2	5	1	0	0
K00609	7344	5697	4932	1429	6793	1508	6475	6822	7205	1389	2572
K00610	6529	4870	4526	1019	5074	1137	4612	5092	5614	1105	1170
K00611	6884	5288	4743	1252	6082	1338	5609	6086	6539	1238	2425
K00612	1208	915	472	418	2139	413	1805	2215	1915	469	171
K00613	0	0	0	0	0	0	0	0	0	0	0
K00614	64	82	38	24	140	24	162	149	146	28	112
K00615	5098	6507	5358	1885	8854	1798	8333	9076	8655	1577	5244
K00616	1976	1949	907	899	4242	873	4025	4343	4412	753	3766
K00617	417	449	223	246	952	206	1064	923	1077	141	1181
K00619	1275	1161	519	486	2166	550	2281	2116	2822	622	934
K00620	3865	5334	4724	1212	5731	1381	5699	5726	6616	1386	2403
K00621	735	500	277	229	1348	217	953	1398	1197	238	115
K00622	42	30	28	19	75	11	91	83	39	3	0
K00624	0	0	0	0	0	0	0	0	0	0	0
K00625	305	241	123	115	518	121	560	537	344	132	28
K00626	10508	10189	9298	2355	10897	2413	10387	11051	11599	2383	2896
K00627	839	827	383	400	1616	350	1849	1634	1586	206	1396
K00630	0	0	0	0	0	0	0	0	0	0	0
K00631	64	81	38	24	138	24	161	146	144	28	112
K00632	3854	811	342	321	1593	371	1643	1538	1620	332	782
K00633	175	137	72	72	282	62	368	305	137	10	2
K00634	26	12	5	4	20	5	21	22	12	3	1
K00635	0	0	0	0	0	0	0	0	0	0	0
K00638	213	184	97	99	478	109	568	463	268	19	380
K00639	2486	2399	1155	1134	5148	1053	5146	5233	5191	858	4128
K00640	1997	1791	854	857	3588	866	3893	3549	4239	802	2313
K00641	672	660	344	347	1331	282	1482	1366	1322	250	832
K00643	0	0	0	0	0	0	0	0	0	0	0
K00645	1007	1068	494	506	2170	475	2317	2191	2188	376	2159
K00646	0	0	0	0	0	0	0	0	0	0	0
K00647	985	968	509	570	2027	442	2384	2042	1993	218	1762
K00648	2368	2475	1198	1260	5118	1113	5674	5198	5131	741	5260
K00650	0	0	0	0	0	0	0	0	0	0	0
K00651	53	28	9	11	45	11	51	44	52	16	5
K00652	826	801	382	394	1545	333	1705	1602	1500	291	1029
K00653	0	0	0	0	0	0	0	0	0	0	0
K00654	0	0	0	0	0	0	0	0	0	0	0
K00655	1802	1936	919	949	4004	885	4328	4029	4077	702	4106
K00656	103	72	41	28	147	28	156	158	125	26	6
K00657	117	80	37	39	250	60	254	209	188	28	382
K00658	1194	1303	642	680	2720	590	2969	2738	2908	458	2938
K00660	478	594	266	299	1126	248	1240	1143	1459	202	1552
K00661	454	380	171	170	819	178	929	823	628	77	690
K00662	735	500	277	229	1348	218	953	1398	1197	238	115
K00663	0	0	0	0	0	0	0	0	0	0	0
K00666	1904	3575	3930	522	2327	514	2216	2408	2309	480	921
K00672	2113	3618	3968	513	2512	601	2383	2520	2684	514	386
K00673	23	23	11	15	94	21	82	101	48	4	184
K00674	732	754	350	363	1500	326	1649	1492	1447	268	1212
K00675	42	30	28	19	75	11	91	83	39	3	0
K00676	950	760	360	336	1434	385	1572	1366	2015	416	155
K00677	1070	1094	515	524	2221	488	2405	2246	2206	385	2156
K00680	4012	3644	1778	1813	7522	1798	8302	7454	8582	1459	5090
K00681	4986	1801	890	825	3813	780	3598	3869	3920	779	1342
K00683	9	2	2	0	3	0	1	2	2	0	0
K00684	302	255	134	128	595	134	611	629	375	126	209
K00685	314	336	166	210	700	154	777	708	840	104	876
K00686	0	0	0	0	0	0	0	0	0	0	0
K00687	0	0	0	0	0	0	0	0	0	0	0
K00688	5110	2014	912	873	3843	960	4035	3787	4703	953	1962
K00689	0	0	0	0	0	0	0	0	0	0	0
K00690	22	18	9	10	32	7	29	34	41	5	3
K00691	0	0	0	0	0	0	0	0	0	0	0
K00692	22	18	2	5	14	2	17	16	25	2	2
K00693	64	81	38	24	138	24	161	146	144	28	112
K00694	232	324	109	114	520	121	525	529	677	98	763
K00695	34	27	12	14	43	13	46	46	65	10	6
K00696	41	34	14	20	111	27	102	122	76	9	187
K00697	1351	1191	564	567	2236	552	2486	2191	3030	553	968
K00698	0	0	0	0	0	0	0	0	0	0	0
K00700	720	716	357	338	1651	362	1715	1694	1414	265	1641
K00701	0	0	0	0	0	0	0	0	0	0	0
K00702	0	0	0	0	0	0	0	0	0	0	0
K00703	4297	1401	624	626	2740	625	2849	2721	2954	516	2219
K00705	4063	1140	544	551	2229	506	2341	2233	2491	440	1531
K00712	0	0	0	0	0	0	0	0	0	0	0
K00713	0	0	0	0	0	0	0	0	0	0	0
K00720	204	272	110	113	562	134	516	572	668	182	767
K00721	11262	6837	5365	1891	8998	2050	8565	9027	9805	1909	4930
K00728	22	18	9	10	31	8	29	33	41	5	3
K00729	0	0	0	0	0	0	0	0	0	0	0
K00737	0	0	0	0	0	0	0	0	0	0	0
K00743	0	0	0	0	0	0	0	0	0	0	0
K00745	0	0	0	0	0	0	0	0	0	0	0
K00748	1010	1062	489	509	2148	477	2311	2168	2179	377	2156
K00752	0	1	0	0	1	0	0	0	1	0	0
K00753	0	0	0	0	0	0	0	0	0	0	0
K00754	9060	10574	7272	4158	16987	3956	18058	17125	19121	3058	14849
K00756	48	32	29	20	78	12	95	88	41	3	0
K00757	4294	1360	585	608	2529	604	2769	2481	2987	502	2037
K00758	4338	1191	555	487	2205	560	2335	2112	2929	584	327
K00759	7099	5394	4772	1248	6083	1371	5690	6117	6517	1357	1524
K00760	926	1015	457	475	2060	456	2193	2066	2102	366	2154
K00761	4274	1296	573	569	2353	551	2597	2303	2631	453	1302
K00762	8352	6485	5300	1776	8270	1903	8098	8242	9290	1814	2735
K00763	5507	4303	4227	798	3604	810	3592	3686	3681	608	1904
K00764	4295	5576	4884	1400	6544	1455	6308	6616	6881	1370	2545
K00765	4023	5346	4796	1306	6202	1352	5884	6269	6405	1231	2504
K00766	4082	5394	4811	1331	6259	1373	5989	6335	6524	1254	2516
K00767	4070	5368	4804	1314	6237	1361	5921	6300	6446	1243	2510
K00768	268	310	124	129	627	153	597	651	765	203	777
K00769	1704	1268	641	569	2795	606	2547	2789	3234	657	272
K00772	13413	5885	4942	1383	6799	1571	6282	6728	7752	1613	1355
K00773	8107	6284	5222	1690	7963	1815	7738	7927	8860	1701	2697
K00776	0	0	0	0	0	0	0	0	0	0	0
K00777	62	48	15	26	128	29	123	146	104	9	189
K00782	904	840	404	438	1633	384	1845	1678	1722	371	947
K00783	1446	1253	584	560	2527	642	2717	2456	3015	634	1309
K00784	8287	6376	5240	1722	7855	1832	7787	7790	8973	1758	1820
K00785	904	969	451	484	2060	457	2172	2077	2016	334	2221
K00786	1813	1675	787	792	3396	832	3681	3368	4050	763	2300
K00787	2938	4135	4259	725	4132	766	3192	4336	3660	745	328
K00788	1458	1590	669	697	3028	702	3182	3052	3299	684	2968
K00789	8296	6573	5312	1784	8421	1920	8206	8390	9456	1789	3454
K00790	970	1034	476	487	2052	451	2218	2062	2113	369	1971
K00791	1194	1209	566	579	2451	541	2694	2490	2324	390	2161
K00793	1787	1596	774	739	3552	702	3302	3622	3439	625	2275
K00794	8496	6637	5367	1847	8485	1975	8395	8440	9605	1926	2761
K00795	6313	7190	5654	2082	9927	2170	9398	10052	10746	2174	3390
K00796	3737	3144	1501	1423	6456	1479	6491	6400	7524	1465	2591
K00797	5216	4064	4100	688	3146	726	2973	3190	3397	663	1617
K00798	1395	1193	534	498	2560	523	2184	2643	2654	605	1129
K00799	158	137	75	70	304	75	245	312	308	126	31
K00800	3919	5235	4745	1254	6009	1305	5726	6082	6187	1173	2487
K00801	56	42	14	23	116	26	105	123	86	8	187
K00802	0	0	0	0	0	0	0	0	0	0	0
K00803	242	225	86	86	338	100	400	334	471	138	38
K00804	6767	7163	5760	2117	10531	2274	9493	10602	11473	2309	2204
K00805	136	204	73	84	386	91	391	400	524	75	749
K00806	8337	6478	5297	1772	8249	1897	8074	8211	9260	1811	2731
K00808	42	30	28	19	75	11	91	83	39	3	0
K00809	8394	6325	5272	1667	8320	1830	7567	8341	9182	1888	1751
K00810	1672	1440	688	703	2911	708	3241	2881	3424	582	1717
K00811	265	210	107	106	521	118	606	505	306	29	383
K00812	14032	10742	9524	2515	12122	2718	11371	12171	13184	2592	3772
K00813	25	23	11	16	94	21	82	101	49	4	184
K00814	0	0	0	0	0	0	0	0	0	0	0
K00817	5806	6887	5554	2031	9166	2066	9187	9225	9954	1953	3507
K00818	1085	1124	536	599	2324	510	2540	2339	2372	385	2274
K00819	562	573	290	313	1213	263	1407	1205	1185	142	1182
K00820	10765	6246	5140	1631	7764	1739	7402	7748	8512	1594	3389
K00821	5390	6378	5276	1691	8574	1849	7709	8673	9119	1869	3005
K00822	0	0	0	0	0	0	0	0	0	0	0
K00823	7956	3726	3940	477	2472	580	2193	2451	2624	501	213
K00824	25	23	11	16	94	21	82	101	49	4	184
K00825	401	368	147	152	569	163	644	564	761	220	62
K00826	5906	7085	5685	2194	10101	2118	9695	10232	10374	1823	5544
K00827	0	0	0	0	0	0	0	0	0	0	0
K00829	0	0	0	0	1	0	0	2	0	0	0
K00830	32	25	9	12	38	9	33	42	46	8	4
K00831	995	1018	504	557	2097	453	2397	2106	2223	290	2174
K00832	25	23	11	16	94	21	82	101	49	4	184
K00833	1565	1427	686	665	3127	612	2880	3228	3093	580	1884
K00835	22	18	9	10	35	8	30	37	43	5	3
K00836	820	560	294	257	1481	245	1080	1537	1317	249	306
K00837	2920	2844	1298	1354	5539	1350	5981	5518	6597	1321	4209
K00839	5884	4466	4322	841	3987	970	3860	3956	4600	968	1073
K00840	0	0	0	0	0	0	0	0	0	0	0
K00841	0	0	0	0	0	0	0	0	0	0	0
K00842	222	257	110	111	499	113	526	515	609	92	753
K00843	0	0	0	0	0	0	0	0	0	0	0
K00844	0	0	0	0	0	0	0	0	0	0	0
K00845	4579	1748	771	775	3480	798	3567	3473	3798	724	3185
K00846	0	0	0	0	0	0	0	0	0	0	0
K00847	1231	904	487	422	2337	436	1963	2387	1897	405	713
K00848	68	54	39	36	172	32	174	187	90	7	184
K00849	3707	687	309	282	1224	299	1317	1204	1314	260	98
K00850	1926	2038	928	984	3994	895	4377	4062	4278	697	3936
K00851	170	239	107	104	478	104	490	490	585	77	752
K00852	8190	3940	4050	584	2822	679	2643	2811	3052	623	246
K00853	43	32	28	19	77	11	94	87	43	3	0
K00854	1261	1032	506	471	2007	508	2251	1974	2416	463	357
K00855	1006	797	382	357	1497	401	1633	1433	2100	428	162
K00856	124	198	72	81	377	90	382	383	518	73	748
K00857	673	649	310	333	1328	290	1526	1336	1325	171	1193
K00858	8361	6427	5297	1756	8478	1818	7815	8556	8878	1746	2728
K00859	1016	1072	489	506	2158	474	2316	2177	2187	375	2157
K00860	5581	2340	1109	1009	4891	1093	4683	4883	5554	1099	2150
K00861	0	0	0	0	0	0	0	0	0	0	0
K00862	22	18	2	4	14	2	17	16	24	2	2
K00863	0	0	0	0	0	0	0	0	0	0	0
K00864	4144	1162	533	538	2141	502	2361	2145	2428	414	1096
K00865	250	193	114	102	399	83	497	427	219	19	7
K00866	0	0	0	0	0	0	0	0	0	0	0
K00867	0	0	0	0	0	0	0	0	0	0	0
K00868	34	19	6	8	31	8	37	32	42	13	4
K00869	6410	4698	4478	955	4863	1083	4375	4820	5183	1028	795
K00870	30	18	3	6	20	4	22	19	36	4	3
K00872	1460	1246	623	577	2677	500	2511	2775	2595	430	946
K00873	4479	1531	689	700	2981	704	3165	2963	3339	631	2251
K00874	511	432	214	207	894	211	1034	879	762	142	419
K00875	0	0	0	0	0	0	0	0	0	0	0
K00876	733	673	339	355	1387	298	1610	1389	1344	174	1193
K00877	2156	1747	804	712	3484	779	3244	3468	4001	934	345
K00878	200	183	79	79	291	81	326	282	390	108	34
K00879	0	0	0	0	0	0	0	0	0	0	0
K00880	22	18	2	4	14	2	17	16	24	2	2
K00881	0	0	0	0	0	0	0	0	0	0	0
K00882	1020	810	391	361	1533	398	1686	1478	2081	422	157
K00883	23	23	11	15	94	21	82	101	48	4	184
K00884	130	204	73	84	389	94	400	406	536	74	750
K00885	0	0	0	0	0	0	0	0	0	0	0
K00886	128	129	76	52	246	43	282	265	226	36	115
K00887	0	0	0	0	0	0	0	0	0	0	0
K00891	4081	5379	4807	1322	6237	1369	5971	6312	6476	1255	2512
K00892	0	0	0	0	0	0	0	0	0	0	0
K00893	0	0	0	0	0	0	0	0	0	0	0
K00894	0	0	0	0	0	0	0	0	0	0	0
K00895	98	58	37	31	122	23	143	130	93	19	5
K00897	0	0	0	0	0	0	0	0	0	0	0
K00899	64	80	38	24	138	24	160	146	143	28	112
K00900	0	0	0	0	0	0	0	0	0	0	0
K00901	752	811	391	420	1622	355	1830	1681	1749	226	1745
K00903	223	223	115	94	448	98	407	460	455	155	143
K00904	0	0	0	0	0	0	0	0	0	0	0
K00906	0	0	0	0	0	0	0	0	0	0	0
K00908	282	230	121	130	403	97	373	425	529	65	43
K00912	966	1027	470	489	2085	461	2252	2103	2097	367	2149
K00917	4	9	7	3	22	2	14	18	22	1	2
K00918	2959	2369	1108	1016	4462	1188	4822	4264	6212	1290	473
K00919	931	1002	460	474	1939	424	2095	1996	2026	361	1778
K00924	2224	2546	1138	1390	6481	1468	6340	6758	5970	796	10662
K00925	466	381	206	201	1006	228	1038	1015	653	157	775
K00926	3624	728	281	276	1249	326	1286	1219	1699	338	846
K00927	7350	5703	4933	1432	6805	1512	6493	6845	7223	1390	2574
K00928	4292	5635	4940	1472	6783	1463	6575	6878	7128	1295	3290
K00929	26	12	5	4	20	5	21	22	12	3	1
K00930	6035	7257	5680	2176	9911	2237	9959	9950	10768	2060	4933
K00931	605	661	291	272	1283	282	1357	1340	1194	252	1082
K00932	0	0	0	0	0	0	0	0	0	0	0
K00933	0	0	0	0	0	0	0	0	0	0	0
K00934	192	252	111	116	548	122	556	570	608	80	932
K00935	0	0	0	0	0	0	0	0	0	0	0
K00936	14726	13817	6729	7071	27759	6614	30255	27561	33309	5913	19499
K00937	759	734	383	398	1632	358	1783	1641	1523	273	1393
K00938	0	0	0	0	0	0	0	0	0	0	0
K00939	7487	5816	4994	1479	7077	1566	6734	7127	7425	1421	2765
K00940	7312	5681	4924	1425	6765	1501	6448	6802	7179	1381	2570
K00941	13899	10544	9452	2440	11803	2634	11016	11851	12458	2503	2913
K00942	995	1055	487	502	2144	472	2298	2162	2162	373	2155
K00943	6728	5096	4632	1106	5536	1233	5016	5573	5967	1231	1386
K00944	0	0	0	0	0	0	0	0	0	0	0
K00945	7350	5692	4928	1423	6783	1506	6469	6809	7194	1393	2572
K00946	7153	5524	4860	1353	6527	1430	6164	6558	6847	1284	2542
K00947	98	58	37	31	122	23	142	130	93	19	5
K00948	7511	5920	5055	1572	7280	1589	7026	7323	7787	1413	3346
K00949	115	90	45	41	272	63	272	230	209	29	385
K00950	965	1021	469	483	2026	448	2204	2041	2089	368	1969
K00951	878	849	395	406	1671	369	1823	1668	1647	314	1231
K00952	10535	5638	4918	1344	6806	1474	5976	6815	7349	1506	625
K00953	0	0	0	0	0	0	0	0	0	0	0
K00954	706	742	332	308	1538	339	1604	1555	1371	273	1463
K00955	31	27	11	17	96	21	86	109	51	6	185
K00956	589	584	304	325	1194	251	1397	1242	1164	143	990
K00957	691	669	345	361	1393	297	1550	1443	1344	252	1012
K00958	4430	1298	603	544	2776	584	2365	2784	3044	679	981
K00960	952	760	360	336	1435	384	1572	1368	2013	416	155
K00961	0	0	0	0	0	0	0	0	0	0	0
K00962	972	1032	476	487	2050	451	2217	2061	2114	369	1971
K00963	2309	3818	4054	577	2802	662	2661	2815	2966	646	237
K00964	4471	1348	580	535	2350	618	2480	2228	3196	672	256
K00965	5492	2179	992	910	4409	1004	4089	4368	5182	1108	1330
K00966	6112	2484	1192	1051	5320	1126	4653	5316	5873	1294	516
K00967	0	0	0	0	0	0	0	0	0	0	0
K00968	0	0	0	0	0	0	0	0	0	0	0
K00969	995	1055	487	502	2144	472	2299	2162	2162	373	2155
K00970	909	997	420	454	1836	412	1953	1875	1959	350	1678
K00971	1028	993	473	457	1990	429	2161	2015	1891	355	1528
K00972	192	252	111	116	548	122	556	570	608	80	932
K00973	13347	10235	9290	2342	10999	2506	10688	10962	12026	2250	4226
K00974	1218	1198	618	650	2608	575	2742	2633	2596	586	2124
K00975	455	578	250	260	1271	289	1207	1314	1396	272	1889
K00978	358	433	176	172	845	189	804	870	875	209	963
K00979	989	1049	480	504	2177	482	2334	2203	2144	371	2333
K00980	2963	4238	4265	753	3922	830	3415	3986	4012	780	333
K00981	1030	1079	498	518	2240	494	2381	2265	2213	377	2339
K00982	182	194	70	65	371	84	320	386	300	132	214
K00983	528	525	268	297	1071	239	1194	1098	1080	215	714
K00984	0	0	0	0	0	0	0	0	0	0	0
K00985	0	0	0	0	0	0	0	0	0	0	0
K00986	1147	1024	471	448	1992	517	2085	1930	2676	596	921
K00988	22	18	9	10	31	7	29	33	41	5	3
K00989	390	455	190	179	886	199	843	912	930	216	969
K00990	218	223	98	82	448	96	407	462	338	134	214
K00991	1013	1049	496	498	2046	443	2219	2102	2101	373	1781
K00992	13241	9931	9144	2147	10144	2429	9800	10075	11806	2383	1834
K00994	0	0	0	0	0	0	0	0	0	0	0
K00995	7779	5984	5034	1451	7161	1631	6701	7148	8001	1690	1551
K00996	727	791	397	417	1619	356	1732	1652	1738	296	1470
K00997	1090	934	455	397	2201	407	1762	2273	2079	448	1080
K00998	1864	1691	805	803	3366	813	3683	3308	4028	770	2116
K00999	0	0	0	0	0	0	0	0	0	0	0
K01000	970	1032	476	486	2050	451	2217	2061	2113	369	1971
K01001	6084	4412	4358	832	4315	936	3757	4320	4558	882	376
K01002	0	0	0	0	0	0	0	0	0	0	0
K01003	251	226	83	92	332	99	412	337	480	133	40
K01004	0	0	0	0	0	0	0	0	0	0	0
K01005	102	72	35	33	235	55	236	192	166	22	380
K01006	1295	1058	520	476	2446	485	2064	2536	2439	558	1110
K01007	6419	4963	4542	1077	4801	1146	4863	4790	5427	1089	1158
K01008	120	110	58	48	254	59	196	257	238	120	28
K01011	1034	781	403	331	1845	321	1402	1910	1665	386	161
K01012	5877	4483	4354	882	4449	902	3822	4564	4393	816	1995
K01013	0	0	0	0	0	0	0	0	0	0	0
K01014	0	0	0	0	0	0	0	0	0	0	0
K01015	0	0	0	0	0	0	0	0	0	0	0
K01023	0	0	0	0	0	0	0	0	0	0	0
K01025	0	0	0	0	0	0	0	0	0	0	0
K01026	61	58	17	13	87	27	110	98	130	34	9
K01027	0	0	0	0	0	0	0	0	0	0	0
K01028	354	396	195	218	748	158	860	758	940	129	804
K01029	410	448	222	246	956	206	1066	929	1077	141	1181
K01031	0	0	0	0	4	0	1	4	2	0	0
K01032	0	0	0	0	4	0	1	4	2	0	0
K01034	2	2	0	0	2	0	2	5	1	0	0
K01035	0	0	0	0	0	0	0	0	0	0	0
K01036	0	0	0	0	0	0	0	0	0	0	0
K01039	195	173	71	76	268	79	312	263	368	107	31
K01040	8	1	1	1	5	2	5	4	11	2	1
K01041	15	8	2	5	16	4	20	18	24	6	2
K01042	129	122	60	58	334	76	268	355	268	120	210
K01043	1063	1045	532	584	2377	519	2620	2291	2347	274	2816
K01044	0	0	0	0	0	0	0	0	0	0	0
K01045	23	23	11	15	94	21	82	101	48	4	184
K01046	45	41	20	25	125	29	111	134	89	9	187
K01047	28	29	9	8	34	14	64	32	68	23	5
K01048	23	23	11	15	94	21	82	101	48	4	184
K01049	0	0	0	0	0	0	0	0	0	0	0
K01051	146	130	71	67	266	58	349	290	115	2	1
K01053	815	889	434	463	1931	424	2053	1998	1904	324	2122
K01054	9	0	0	1	1	1	0	1	1	0	0
K01055	195	173	71	77	268	79	312	263	368	107	31
K01056	995	1055	487	502	2144	472	2299	2162	2162	373	2155
K01057	277	330	157	148	704	158	667	721	792	194	774
K01058	9	0	0	1	1	0	0	1	1	0	0
K01060	46	39	35	22	96	14	104	100	60	4	2
K01061	1028	1090	521	547	2199	502	2370	2266	2333	437	1980
K01062	0	0	0	0	0	0	0	0	0	0	0
K01066	534	518	276	313	1142	246	1303	1186	1055	114	1062
K01067	54	40	31	22	87	16	108	97	63	8	3
K01068	978	788	369	344	1466	398	1634	1396	2080	440	160
K01069	2104	1689	803	737	3638	805	3332	3630	4227	892	1245
K01070	22	18	9	10	31	8	29	33	41	5	3
K01071	64	48	37	29	106	18	120	116	80	8	3
K01073	6	6	1	3	12	4	18	23	18	1	2
K01075	90	104	49	40	234	46	243	250	194	32	296
K01076	747	799	369	419	1727	393	1896	1725	1791	223	2197
K01077	1130	1184	592	679	2644	580	2887	2688	2686	318	3252
K01078	81	52	37	31	108	19	124	124	83	10	4
K01079	7379	5455	4822	1286	6164	1442	5839	6128	7176	1446	582
K01080	0	0	0	0	0	0	0	0	0	0	0
K01081	87	60	33	29	214	51	215	177	150	15	378
K01082	46	41	20	26	128	29	111	137	90	9	187
K01083	0	0	0	0	0	0	0	0	0	0	0
K01084	30	18	3	6	20	4	22	19	36	4	3
K01085	20	11	4	3	17	4	17	16	19	7	2
K01087	1377	1280	588	616	2433	611	2670	2388	3344	592	1598
K01089	1095	1117	561	604	2254	486	2650	2279	2280	285	1990
K01090	8193	2166	996	972	4110	1023	4283	3994	5318	1026	1941
K01091	7571	1598	688	646	2985	724	3004	2912	3303	740	1350
K01092	7377	5721	4970	1447	6760	1482	6457	6838	7187	1379	2200
K01093	0	0	0	0	0	0	0	0	0	0	0
K01095	324	402	159	150	732	165	712	751	809	205	778
K01096	0	0	0	0	0	0	0	0	0	0	0
K01097	0	0	0	0	0	0	0	0	0	0	0
K01101	3338	376	147	124	638	161	610	589	861	163	70
K01103	0	0	0	0	0	0	0	0	0	0	0
K01104	1251	1301	651	699	2736	596	2985	2763	2898	456	2835
K01112	239	198	100	101	494	110	574	476	289	17	381
K01113	119	131	59	53	280	58	290	306	254	39	301
K01114	283	278	146	120	585	125	639	615	404	136	131
K01115	0	0	0	0	0	0	0	0	0	0	0
K01117	0	0	0	0	0	0	0	0	0	0	0
K01118	214	180	108	102	436	90	520	474	203	8	185
K01119	51	22	9	8	38	9	40	37	41	12	4
K01120	0	0	0	0	0	0	0	0	0	0	0
K01121	0	0	0	0	0	0	0	0	0	0	0
K01126	10211	5854	4983	1563	6822	1609	7010	6783	7554	1352	3380
K01127	0	0	0	0	0	0	0	0	0	0	0
K01128	0	0	0	0	1	0	0	2	0	0	0
K01129	539	518	233	212	1147	250	1181	1152	820	196	896
K01130	1285	1497	673	758	3444	763	3540	3596	3380	433	5188
K01131	0	0	0	0	0	0	0	0	0	0	0
K01132	26	24	11	17	98	22	83	106	51	4	184
K01133	57	42	14	23	118	26	105	126	88	8	187
K01134	1114	1357	596	685	3151	698	3163	3280	3226	423	5184
K01135	264	348	143	153	802	178	790	840	810	114	1412
K01136	355	427	178	207	1106	247	1056	1167	985	132	1966
K01137	50	46	22	32	192	42	165	206	99	8	368
K01138	1713	1993	879	1008	4812	1067	4822	5043	4496	568	7705
K01139	87	108	27	24	112	23	114	113	118	20	12
K01141	0	0	0	0	0	0	0	0	0	0	0
K01142	856	832	400	405	1657	363	1840	1676	1594	297	1223
K01143	0	0	0	0	0	0	0	0	0	0	0
K01144	616	602	300	323	1257	274	1459	1249	1238	158	1186
K01145	0	0	0	0	0	0	0	0	0	0	0
K01146	0	0	0	0	0	0	0	0	0	0	0
K01147	22	18	9	10	31	8	29	33	41	5	3
K01150	25	23	11	16	94	21	82	101	49	4	184
K01151	6684	5062	4598	1085	5457	1223	4934	5497	5929	1230	1386
K01152	0	0	0	0	0	0	0	0	0	0	0
K01153	3365	3017	1489	1511	6435	1408	6510	6479	7203	1269	4286
K01154	3376	3057	1481	1497	6314	1376	6391	6395	7144	1272	3917
K01155	573	567	283	305	1081	232	1277	1117	1125	148	813
K01156	0	2	2	0	3	0	1	2	2	0	0
K01157	26	24	11	16	96	22	82	104	50	4	184
K01158	0	0	0	0	0	0	0	0	0	0	0
K01159	995	1055	487	502	2144	472	2299	2162	2162	373	2155
K01160	0	0	0	0	0	0	0	0	0	0	0
K01161	6	6	1	3	12	4	18	23	18	1	2
K01162	20	8	3	3	14	4	14	12	10	3	1
K01163	26	17	5	8	27	9	37	30	47	11	5
K01164	28	29	9	8	34	14	64	32	68	23	5
K01166	0	0	0	0	0	0	0	0	0	0	0
K01167	0	0	0	0	0	0	0	0	0	0	0
K01169	0	0	0	0	0	0	0	0	0	0	0
K01170	10348	5466	4848	1269	6544	1397	5669	6556	6992	1401	595
K01172	0	0	0	0	0	0	0	0	0	0	0
K01173	0	1	1	0	3	0	2	3	5	0	0
K01174	388	434	190	222	745	159	828	749	936	124	707
K01175	1756	1822	900	987	3941	867	4305	3968	4129	616	4568
K01176	4625	1522	699	677	2824	702	3013	2736	3786	695	1026
K01178	1341	1184	567	573	2289	568	2533	2247	3027	552	1146
K01179	10323	6004	5038	1596	6879	1603	7078	6873	7794	1366	3313
K01180	30	18	3	6	20	4	22	19	36	4	3
K01181	320	268	163	158	718	148	800	783	365	26	554
K01182	86	98	40	29	152	26	178	162	168	30	114
K01183	0	0	0	0	0	0	0	0	0	0	0
K01184	0	0	0	0	0	0	0	0	0	0	0
K01185	0	0	0	0	0	0	0	0	0	0	0
K01186	135	96	56	62	300	63	296	322	184	21	372
K01187	971	900	471	479	1973	429	2207	2018	1707	288	1400
K01188	4359	1414	696	712	2748	610	3030	2768	2936	491	1581
K01190	4118	1021	505	459	2065	483	2245	2065	1863	407	499
K01191	3307	353	164	137	642	152	613	603	786	133	64
K01192	46	40	35	22	97	14	104	100	62	4	2
K01193	30	18	3	6	20	4	22	19	36	4	3
K01194	106	110	66	42	212	35	252	229	182	32	112
K01195	84	62	57	38	152	22	184	168	79	6	0
K01196	0	0	0	0	0	0	0	0	0	0	0
K01197	0	0	0	0	0	0	0	0	0	0	0
K01198	85	63	58	38	154	22	186	171	83	6	0
K01199	0	0	0	0	0	0	0	0	0	0	0
K01200	4	2	1	0	4	1	5	5	2	0	0
K01201	211	169	101	91	360	73	460	393	183	10	2
K01202	0	0	0	0	0	0	0	0	0	0	0
K01205	15	10	2	5	17	4	22	20	28	6	2
K01206	757	639	378	313	1457	298	1660	1502	933	194	520
K01207	398	415	210	239	845	187	874	851	1005	214	716
K01208	22	18	9	10	31	8	29	33	41	5	3
K01209	613	507	333	268	1145	224	1334	1227	638	139	26
K01210	0	0	0	0	0	0	0	0	0	0	0
K01212	189	146	76	75	296	65	383	319	157	14	4
K01213	0	0	0	0	0	0	0	0	0	0	0
K01214	0	0	0	0	0	0	0	0	0	0	0
K01215	0	0	0	0	0	0	0	0	0	0	0
K01216	0	0	0	0	0	0	0	0	0	0	0
K01217	0	0	0	0	0	0	0	0	0	0	0
K01218	42	31	29	19	77	11	92	85	39	3	0
K01219	84	60	56	38	150	22	182	166	78	6	0
K01220	0	0	0	0	0	0	0	0	0	0	0
K01222	4	9	7	2	20	2	13	17	21	1	2
K01223	0	0	0	0	0	0	0	0	0	0	0
K01224	62	42	32	22	93	15	109	102	61	10	2
K01225	0	0	0	0	0	0	0	0	0	0	0
K01226	0	0	0	0	0	0	0	0	0	0	0
K01227	0	0	0	0	0	0	0	0	0	0	0
K01229	0	0	0	0	0	0	0	0	0	0	0
K01230	0	0	0	0	0	0	0	0	0	0	0
K01232	0	0	0	0	0	0	0	0	0	0	0
K01233	0	0	0	0	0	0	0	0	0	0	0
K01234	22	18	9	10	31	8	29	33	41	5	3
K01235	42	31	28	19	75	11	92	84	39	3	0
K01236	211	269	120	125	577	129	584	600	646	85	935
K01238	4337	4599	2283	2724	9131	2006	10498	9150	10924	1345	9926
K01239	273	320	141	151	720	158	703	747	757	94	1125
K01241	266	247	138	114	492	97	619	533	321	39	114
K01242	0	0	0	0	0	0	0	0	0	0	0
K01243	303	237	120	114	506	117	553	540	340	130	28
K01244	0	0	0	0	0	0	0	0	0	0	0
K01246	1102	831	456	390	2150	388	1875	2210	1727	298	794
K01247	77	57	20	12	91	18	72	89	113	17	8
K01249	88	47	11	18	60	15	74	71	107	12	10
K01250	87	104	49	38	232	45	242	247	191	32	296
K01251	7299	5686	4931	1425	6783	1503	6457	6811	7197	1380	2572
K01252	0	0	0	0	0	0	0	0	0	0	0
K01253	0	1	0	0	2	0	2	3	3	0	0
K01254	0	0	0	0	0	0	0	0	0	0	0
K01255	4333	1242	564	500	2705	548	2238	2715	2839	597	1146
K01256	796	788	381	415	1601	369	1827	1598	1636	256	1400
K01258	289	232	117	122	611	139	685	600	354	33	567
K01259	115	128	60	46	220	46	239	239	250	40	121
K01261	0	0	0	0	0	0	0	0	0	0	0
K01262	3839	5365	4790	1376	6048	1378	6216	6123	6247	1152	3562
K01263	0	0	0	0	0	0	0	0	0	0	0
K01264	0	0	0	0	0	0	0	0	0	0	0
K01265	7860	6198	5183	1724	7826	1735	7666	7889	8246	1512	3456
K01266	31	32	14	4	66	12	42	64	67	11	4
K01267	0	0	0	0	0	0	0	0	0	0	0
K01268	0	0	0	0	0	0	0	0	0	0	0
K01269	4856	2007	947	1024	4031	909	4379	4044	4608	725	3889
K01270	302	227	114	112	544	124	634	523	331	39	386
K01271	5474	3947	4116	624	3388	689	2750	3471	3158	612	453
K01273	773	780	368	388	1476	340	1701	1503	1596	273	1028
K01274	18	13	8	3	29	4	17	24	26	3	2
K01277	53	29	10	11	46	11	51	45	53	16	5
K01278	1186	1166	582	629	2391	518	2774	2419	2362	302	2178
K01280	23	23	11	15	94	21	82	101	48	4	184
K01281	0	1	0	0	1	0	0	0	1	0	0
K01282	0	0	0	0	0	0	0	0	0	0	0
K01283	0	0	0	0	0	0	0	0	0	0	0
K01284	720	660	338	354	1380	297	1601	1379	1330	177	1191
K01286	120	124	60	50	266	52	272	282	236	38	299
K01289	64	80	38	24	138	24	160	146	143	28	112
K01290	0	0	0	0	0	0	0	0	0	0	0
K01293	0	0	0	0	0	0	0	0	0	0	0
K01295	69	62	46	36	198	34	188	209	112	8	186
K01297	549	565	284	307	1085	234	1280	1131	1151	141	813
K01299	3885	917	412	430	1673	404	1788	1640	2098	376	977
K01301	0	0	0	0	0	0	0	0	0	0	0
K01302	362	395	195	218	749	158	858	759	938	129	804
K01303	3292	352	136	120	584	158	604	533	820	170	67
K01304	3335	377	147	138	698	170	634	665	843	145	248
K01305	2	2	0	0	2	0	2	5	1	0	0
K01308	0	0	0	0	0	0	0	0	0	0	0
K01312	0	0	0	0	0	0	0	0	0	0	0
K01315	0	0	0	0	0	0	0	0	0	0	0
K01316	0	0	0	0	0	0	0	0	0	0	0
K01317	0	0	0	0	0	0	0	0	0	0	0
K01318	0	0	0	0	0	0	0	0	0	0	0
K01322	374	340	166	153	801	176	884	813	557	65	682
K01325	0	0	0	0	0	0	0	0	0	0	0
K01326	0	0	0	0	0	0	0	0	0	0	0
K01337	0	0	0	0	0	0	0	0	0	0	0
K01338	1239	1365	618	629	2784	621	2886	2819	2925	564	2933
K01340	0	0	0	0	0	0	0	0	0	0	0
K01341	0	0	0	0	0	0	0	0	0	0	0
K01342	0	0	0	0	0	0	0	0	0	0	0
K01343	0	0	0	0	0	0	0	0	0	0	0
K01344	0	0	0	0	0	0	0	0	0	0	0
K01346	0	0	0	0	0	0	0	0	0	0	0
K01347	0	0	0	0	0	0	0	0	0	0	0
K01354	64	53	28	28	207	49	206	168	140	12	377
K01355	0	0	0	0	0	0	0	0	0	0	0
K01356	315	363	170	166	806	182	755	834	847	200	960
K01358	1541	1675	782	844	3395	751	3637	3439	3684	568	3789
K01361	0	0	0	0	0	0	0	0	0	0	0
K01362	5562	7536	5711	2435	10958	2380	10677	11261	11326	1909	11119
K01364	0	0	0	0	0	0	0	0	0	0	0
K01365	0	0	0	0	0	0	0	0	0	0	0
K01372	571	529	264	303	1133	254	1312	1115	1104	132	1076
K01376	25	23	11	16	94	21	82	101	49	4	184
K01385	12	13	2	7	24	8	37	46	38	2	5
K01386	0	0	0	0	0	0	0	0	0	0	0
K01387	0	0	0	0	0	0	0	0	0	0	0
K01389	0	0	0	0	0	0	0	0	0	0	0
K01390	0	0	0	0	0	0	0	0	0	0	0
K01392	0	0	0	0	0	0	0	0	0	0	0
K01393	0	0	0	0	0	0	0	0	0	0	0
K01399	0	0	0	0	0	0	0	0	0	0	0
K01400	0	0	0	0	0	0	0	0	0	0	0
K01401	0	0	0	0	0	0	0	0	0	0	0
K01404	0	0	0	0	0	0	0	0	0	0	0
K01406	0	0	0	0	0	0	0	0	0	0	0
K01407	0	0	0	0	0	0	0	0	0	0	0
K01408	0	0	0	0	0	0	0	0	0	0	0
K01409	8295	6456	5292	1765	8227	1892	8046	8187	9218	1806	2727
K01412	130	144	46	44	174	38	171	179	200	30	18
K01414	74	51	39	30	113	20	123	122	85	8	3
K01415	115	102	68	49	264	55	224	269	191	110	18
K01416	0	0	0	0	0	0	0	0	0	0	0
K01417	1033	1077	516	551	2479	547	2557	2534	2325	367	2883
K01419	666	799	344	366	1524	336	1577	1550	1779	336	1769
K01420	1063	1182	549	531	2349	506	2559	2387	2377	416	2375
K01421	0	0	0	0	0	0	0	0	0	0	0
K01422	696	739	339	403	1578	356	1723	1634	1624	204	1998
K01423	4527	4357	2103	2195	8831	1924	9330	8826	10060	1644	6603
K01424	2191	1872	961	960	4288	863	4196	4345	4036	671	2599
K01425	438	463	229	256	977	214	1088	949	1113	146	1184
K01426	287	277	151	120	620	133	606	638	563	178	329
K01427	0	0	0	0	0	0	0	0	0	0	0
K01428	94	67	40	35	132	23	144	142	120	12	7
K01429	94	67	40	35	132	23	144	142	120	12	7
K01430	94	67	40	35	132	23	144	142	120	12	7
K01431	30	18	3	6	20	4	22	19	35	4	3
K01432	0	0	0	0	0	0	0	0	0	0	0
K01433	1001	718	398	347	1834	318	1526	1924	1478	255	306
K01434	667	678	325	347	1354	298	1515	1391	1364	267	1015
K01436	1032	1166	555	609	2236	485	2535	2291	2629	344	2368
K01437	0	0	0	0	0	0	0	0	0	0	0
K01438	1061	1066	489	515	2256	496	2380	2282	2298	381	2341
K01439	6296	4879	4438	987	4568	1147	4572	4537	5383	1120	1495
K01440	0	0	0	0	0	0	0	0	0	0	0
K01442	198	254	97	120	590	139	572	612	653	89	1119
K01443	3482	511	229	223	1043	245	1058	1042	988	147	436
K01444	26	24	11	16	98	22	82	104	52	4	184
K01446	0	0	0	0	0	0	0	0	0	0	0
K01447	225	218	111	96	424	86	530	456	284	36	114
K01448	897	867	419	426	1723	378	1897	1733	1675	311	1229
K01449	1	0	1	0	1	0	2	0	0	0	0
K01450	0	0	0	0	0	0	0	0	0	0	0
K01451	772	793	401	476	1608	351	1848	1635	1779	209	1572
K01452	22	18	9	10	31	7	29	33	42	5	3
K01453	0	1	1	0	2	0	1	2	0	0	0
K01454	0	0	0	0	0	0	0	0	0	0	0
K01455	54	56	18	15	77	19	96	72	118	26	10
K01457	0	1	1	0	3	0	0	1	3	0	0
K01458	0	0	0	0	0	0	0	0	0	0	0
K01459	0	0	0	0	0	0	0	0	0	0	0
K01460	0	0	0	0	0	0	0	0	0	0	0
K01461	0	0	0	0	0	0	0	0	0	0	0
K01462	1094	1173	518	529	2268	500	2431	2289	2304	398	2170
K01463	395	396	184	227	792	170	859	803	964	115	887
K01464	4955	1580	765	677	3336	737	3034	3267	3949	783	333
K01465	7366	6039	5057	1626	7178	1672	7366	7198	7844	1470	4218
K01466	3979	795	396	334	1865	349	1433	1867	1890	364	173
K01467	1584	1562	783	881	3035	691	3498	3094	3373	561	2143
K01468	825	790	373	406	1540	357	1797	1543	1636	262	1220
K01469	48	41	20	26	128	29	111	137	91	9	187
K01470	5335	1893	897	806	3828	865	3607	3766	4580	939	381
K01471	0	0	0	0	0	0	0	0	0	0	0
K01473	293	264	92	102	379	101	445	372	539	137	46
K01474	321	294	101	110	413	115	509	404	607	160	51
K01476	471	464	229	270	901	199	1082	936	958	106	698
K01477	0	0	0	0	0	0	0	0	0	0	0
K01478	10	15	8	6	32	6	31	40	39	2	4
K01479	1328	1122	582	543	2516	460	2341	2606	2427	400	1035
K01480	6334	4874	4517	1055	5140	1105	4655	5196	5353	1070	2256
K01481	0	0	0	0	0	0	0	0	0	0	0
K01482	70	59	37	27	109	25	155	115	107	26	5
K01483	0	0	0	0	0	0	0	0	0	0	0
K01484	23	23	11	15	94	21	82	101	48	4	184
K01485	526	633	286	325	1253	277	1351	1278	1547	211	1739
K01486	6102	4421	4382	849	4360	938	3825	4374	4557	875	374
K01487	377	375	181	226	754	167	835	766	923	115	883
K01488	265	324	154	143	688	155	646	699	766	188	772
K01489	4873	1643	792	764	3539	740	3374	3538	3639	657	1583
K01491	5744	5032	2379	2297	10504	2326	10362	10530	11729	2246	5644
K01492	39	20	7	6	30	7	32	27	29	10	3
K01493	2622	2216	1099	1038	4772	1047	4688	4780	5284	1017	2234
K01494	5179	3925	4066	641	2949	664	2764	2995	2982	595	1054
K01495	2266	2185	1022	1050	4566	957	4458	4622	4935	881	3553
K01496	3337	4622	4461	960	4794	1050	4297	4869	5010	1052	1304
K01497	1105	932	420	385	1721	448	1814	1668	2261	542	185
K01498	0	0	0	0	0	0	0	0	0	0	0
K01499	2156	3639	3973	520	2534	606	2411	2543	2726	519	389
K01500	159	224	85	98	477	112	466	488	572	77	932
K01501	353	394	194	218	744	157	856	753	937	128	804
K01502	0	0	0	0	0	0	0	0	0	0	0
K01503	0	0	0	0	0	0	0	0	0	0	0
K01504	0	0	0	0	0	0	0	0	0	0	0
K01505	508	523	264	285	1012	215	1204	1043	1051	130	804
K01506	922	975	486	532	1976	425	2284	1988	2146	271	1987
K01507	9698	7625	5923	2350	10980	2409	10546	11037	11757	2294	3855
K01509	0	0	0	0	0	0	0	0	0	0	0
K01510	0	0	0	0	0	0	0	0	0	0	0
K01512	3449	4767	4477	972	4872	1074	4387	4943	5226	1102	1147
K01513	31	21	6	10	38	14	60	74	60	4	6
K01514	1134	1192	566	609	2378	519	2632	2397	2490	413	2206
K01515	9127	4693	4418	929	4723	1029	4060	4759	4896	1025	1313
K01516	7367	5720	4943	1444	6887	1529	6557	6923	7253	1393	2756
K01518	764	529	289	247	1454	242	1053	1522	1263	243	301
K01519	0	0	0	0	0	0	0	0	0	0	0
K01520	6278	4867	4540	1080	4926	1160	4983	4882	5437	1014	2229
K01521	0	0	0	0	0	0	0	0	0	0	0
K01523	1392	3058	3683	261	1372	303	1159	1446	1088	211	267
K01524	65	90	18	14	82	16	86	80	78	16	8
K01525	107	120	46	32	156	26	176	164	116	18	8
K01529	769	805	365	425	1666	380	1833	1714	1791	226	2012
K01531	1143	1058	457	433	1916	492	2053	1848	2632	506	914
K01533	9112	7643	5776	2313	10015	2343	10557	9962	11449	2115	5517
K01534	544	418	211	192	863	188	1017	860	676	92	409
K01535	969	768	364	340	1447	390	1594	1391	2036	419	158
K01537	1600	1421	642	622	2806	699	2968	2745	3262	666	1512
K01539	0	0	0	0	0	0	0	0	0	0	0
K01541	950	759	360	336	1432	384	1570	1364	2012	416	155
K01545	0	0	0	0	0	0	0	0	0	0	0
K01546	62	43	17	21	76	19	84	89	96	15	8
K01547	62	43	17	21	76	19	84	89	96	15	8
K01548	62	43	17	21	76	19	84	89	96	15	8
K01550	0	0	0	0	0	0	0	0	0	0	0
K01551	1374	3019	3653	224	1230	265	1037	1312	1017	173	79
K01552	1337	1159	531	514	2272	575	2374	2237	2930	629	1120
K01553	0	0	0	0	0	0	0	0	0	0	0
K01554	0	0	0	0	0	0	0	0	0	0	0
K01555	353	395	195	218	746	158	857	755	936	129	804
K01556	64	84	40	24	143	24	163	151	149	29	112
K01557	0	0	0	0	0	0	0	0	0	0	0
K01559	298	315	157	195	613	135	703	613	806	102	693
K01560	143	114	36	37	216	42	188	225	210	24	196
K01561	22	18	9	10	31	7	29	33	41	5	3
K01563	133	107	67	66	268	55	260	289	214	22	194
K01564	5600	4256	4198	719	3588	858	3399	3556	4072	748	1206
K01565	26	24	11	17	98	22	83	106	51	4	184
K01567	816	867	404	450	1872	423	2063	1930	1928	234	2310
K01568	0	0	0	0	0	0	0	0	0	0	0
K01569	23	23	11	15	94	21	82	101	48	4	184
K01571	3584	739	264	240	1192	276	1176	1169	1468	249	827
K01572	3502	592	258	236	1114	260	1110	1095	1370	225	811
K01573	0	0	0	0	0	0	0	0	0	0	0
K01574	0	0	0	0	0	0	0	0	0	0	0
K01575	951	759	360	336	1434	384	1570	1365	2012	417	155
K01576	42	30	5	12	44	12	58	65	71	6	7
K01577	0	0	0	0	0	0	0	0	0	0	0
K01578	0	0	0	0	0	0	0	0	0	0	0
K01579	991	1046	480	499	2119	469	2285	2141	2139	372	2153
K01580	80	82	29	32	164	50	211	168	186	50	194
K01581	10	6	0	2	4	0	6	13	4	2	1
K01582	22	18	9	10	35	8	30	37	43	5	3
K01583	22	18	9	10	31	8	29	33	41	5	3
K01584	0	0	0	0	0	0	0	0	0	0	0
K01585	4615	1426	674	618	2813	701	3028	2702	3297	616	897
K01586	3365	4891	4540	1111	4985	1166	5065	5020	5304	1003	2580
K01588	4080	5373	4805	1316	6247	1364	5935	6325	6453	1242	2509
K01589	1637	1402	676	653	3015	598	2852	3068	2961	520	1346
K01590	0	0	0	0	0	0	0	0	0	0	0
K01591	7365	5715	4941	1439	6824	1515	6504	6855	7246	1394	2576
K01592	5449	3990	4105	626	3058	752	2960	3011	3537	695	274
K01593	353	393	193	218	743	157	856	753	934	128	804
K01594	0	0	0	0	0	0	0	0	0	0	0
K01595	359	332	157	139	558	128	633	568	657	148	153
K01596	262	232	106	100	391	101	445	408	460	119	35
K01597	105	83	32	40	249	60	262	230	208	18	385
K01598	0	0	0	0	0	0	0	0	0	0	0
K01599	838	841	424	416	1717	364	1892	1739	1601	284	1220
K01601	4249	1098	497	454	2024	532	2110	1914	2790	558	219
K01602	43	35	19	20	62	16	57	65	81	10	7
K01604	3271	319	126	109	558	141	509	512	739	136	61
K01605	83	61	37	26	131	24	138	142	106	19	4
K01606	83	52	17	13	88	21	81	92	97	26	7
K01607	951	760	360	337	1434	384	1572	1366	2014	417	155
K01608	0	0	0	0	0	0	0	0	0	0	0
K01609	4039	5358	4799	1315	6207	1361	5938	6281	6448	1245	2509
K01610	1574	1384	675	668	3150	627	2983	3203	3134	505	2245
K01611	5139	3985	4009	566	2756	657	2618	2790	2984	601	955
K01612	950	759	360	336	1432	384	1570	1364	2012	416	155
K01613	1879	1714	815	816	3455	833	3759	3405	4066	772	2299
K01615	3278	324	146	123	587	141	566	548	721	127	57
K01616	0	0	0	0	0	0	0	0	0	0	0
K01617	0	0	0	0	0	0	0	0	0	0	0
K01618	1275	1098	520	540	2070	524	2303	2004	2852	525	850
K01619	4374	1379	616	613	2612	614	2801	2583	2804	561	1501
K01620	681	677	338	361	1448	312	1560	1492	1381	255	1198
K01621	22	19	10	10	33	9	30	36	44	5	3
K01622	6341	4648	4446	924	4670	1040	4180	4688	5048	1023	416
K01623	8841	6787	5445	1898	8698	2056	8542	8576	10387	2120	1750
K01624	526	458	236	213	1068	233	1135	1078	774	183	705
K01625	846	823	408	396	1857	399	2036	1915	1487	168	1812
K01626	229	190	120	102	485	105	459	511	364	132	211
K01627	966	1027	470	489	2085	461	2252	2103	2097	367	2149
K01628	5620	4174	4193	699	3461	831	3291	3437	3778	804	482
K01629	0	0	0	0	0	0	1	0	0	0	0
K01630	38	34	19	21	130	26	103	133	86	7	188
K01631	0	0	0	0	0	0	0	0	0	0	0
K01632	25	23	11	16	94	21	82	101	49	4	184
K01633	808	856	416	436	1766	386	1975	1770	1860	240	1940
K01634	0	0	0	0	0	0	0	0	0	0	0
K01635	4	9	7	2	20	2	13	17	21	1	2
K01636	26	25	11	16	98	22	84	107	54	4	184
K01637	383	412	196	223	768	161	879	776	973	132	807
K01638	353	394	194	218	748	157	857	757	938	128	804
K01639	255	307	135	153	754	169	740	791	730	94	1302
K01640	503	532	272	287	1035	218	1219	1063	1074	131	807
K01641	796	537	283	241	1388	224	998	1438	1268	246	122
K01643	34	11	6	4	17	5	22	18	16	4	2
K01644	1856	1313	658	577	3127	548	2416	3220	3019	625	284
K01646	5	5	2	3	10	2	11	9	8	1	1
K01647	3160	4696	4457	996	4870	997	4470	5024	4532	845	2365
K01648	1088	944	396	365	1598	415	1745	1532	2170	450	173
K01649	6317	7267	5701	2139	10183	2247	9642	10263	10994	2232	3782
K01652	5495	6657	5404	1890	8686	1991	8537	8699	9701	1967	3478
K01653	3805	5147	4716	1228	5895	1265	5542	5963	5996	1115	2472
K01654	1475	1326	666	646	3027	592	2773	3126	2985	558	1874
K01655	34	31	16	14	54	10	46	58	65	8	7
K01657	4047	5360	4800	1318	6212	1363	5944	6285	6461	1247	2512
K01658	4495	5814	5015	1562	7101	1552	6935	7188	7507	1393	3505
K01659	0	0	0	0	1	0	0	2	0	0	0
K01661	713	675	347	361	1405	299	1612	1402	1372	171	1196
K01662	987	1051	487	500	2142	472	2295	2154	2159	371	2154
K01663	187	173	70	76	263	77	308	259	359	105	31
K01664	524	545	275	300	1109	237	1286	1148	1101	134	988
K01665	964	1023	470	488	2080	460	2252	2102	2095	366	2149
K01666	735	500	277	229	1352	217	954	1402	1199	238	115
K01667	114	85	42	38	144	33	197	151	165	36	10
K01668	0	0	0	0	0	0	0	0	0	0	0
K01669	1646	1773	842	919	3501	764	3854	3532	3921	596	3653
K01671	0	0	0	0	0	0	0	0	0	0	0
K01672	0	0	0	0	0	0	0	0	0	0	0
K01673	979	1013	503	522	2218	486	2371	2249	2180	357	2330
K01674	112	131	38	40	206	44	196	214	167	24	196
K01676	109	70	40	33	135	28	159	140	117	24	8
K01677	2488	4066	4121	672	3147	764	3092	3157	3598	707	991
K01678	2474	4063	4118	671	3144	763	3086	3153	3592	706	990
K01679	1116	1157	542	567	2341	543	2566	2357	2507	472	2181
K01681	2893	2500	1216	1157	5263	1170	5268	5275	5870	1163	2565
K01682	99	118	30	27	124	28	132	127	142	26	15
K01684	268	238	86	105	406	108	447	421	485	116	221
K01685	610	545	228	251	946	247	1123	991	977	223	255
K01686	262	215	116	115	487	102	583	538	281	19	192
K01687	4130	5437	4855	1366	6484	1413	6189	6567	6590	1256	2878
K01689	7371	5720	4939	1431	6835	1517	6504	6867	7250	1399	2574
K01690	0	0	0	0	0	0	0	0	0	0	0
K01692	3594	5300	4719	1372	5689	1271	5985	5813	5973	1086	3921
K01693	4405	5523	4863	1325	6408	1469	6026	6412	7208	1500	1476
K01694	0	0	0	0	0	0	0	0	0	0	0
K01695	4039	5358	4799	1315	6207	1361	5938	6281	6448	1245	2509
K01696	4175	5488	4868	1364	6439	1400	6212	6530	6665	1280	2625
K01697	445	478	232	254	988	220	1128	955	1145	164	1186
K01698	4024	5351	4796	1312	6192	1357	5917	6265	6426	1239	2508
K01699	0	0	0	0	0	0	0	0	0	0	0
K01702	0	0	0	0	0	0	0	0	0	0	0
K01703	12557	16044	14464	3899	18803	4077	17476	19006	19845	3887	5235
K01704	12557	16044	14464	3899	18803	4077	17476	19006	19846	3887	5235
K01705	0	0	0	0	0	0	0	0	0	0	0
K01706	0	0	0	0	0	0	0	0	0	0	0
K01707	0	0	0	0	0	0	0	0	0	0	0
K01708	24	24	11	16	96	22	82	104	50	4	184
K01709	295	385	139	143	739	170	684	755	795	201	960
K01710	5819	7084	5618	2129	9732	2191	9677	9812	10615	1983	5332
K01711	2668	2269	1109	1064	4799	1042	4673	4845	5245	1001	2125
K01712	936	985	442	486	1914	446	2173	1922	2147	333	1968
K01713	0	0	0	0	0	0	0	0	0	0	0
K01714	4297	5874	4984	1610	7123	1636	7363	7245	7380	1271	5250
K01715	1416	1280	627	610	2962	584	2654	3019	3097	576	2080
K01716	0	0	0	0	0	0	0	0	0	0	0
K01718	0	0	0	0	0	0	0	0	0	0	0
K01719	2771	4206	4262	800	4048	798	3587	4176	3510	652	1574
K01720	221	207	80	86	313	95	390	318	445	129	37
K01721	0	0	0	0	0	0	0	0	0	0	0
K01722	0	0	0	0	0	0	0	0	0	0	0
K01724	1607	1465	683	672	3059	604	2827	3134	3281	579	1898
K01725	0	0	0	0	0	0	0	0	0	0	0
K01726	885	661	326	275	1650	283	1260	1660	1435	268	503
K01727	0	0	0	0	0	0	0	0	0	0	0
K01728	99	78	51	52	270	55	261	292	148	13	369
K01729	54	53	27	28	204	48	204	163	138	12	377
K01730	42	30	28	19	75	11	91	83	39	3	0
K01731	0	0	0	0	0	0	0	0	0	0	0
K01732	0	0	0	0	0	0	0	0	0	0	0
K01733	17056	10866	9553	2520	12402	2752	11487	12422	13418	2543	3971
K01734	400	422	199	229	781	166	902	794	995	138	809
K01735	1170	1188	558	584	2400	558	2629	2423	2568	491	2187
K01736	4084	5385	4807	1325	6250	1372	5988	6332	6496	1256	2515
K01737	6979	5668	4880	1420	6412	1467	6473	6417	6963	1310	3546
K01738	5986	4452	4361	870	4611	966	3947	4697	4316	850	1982
K01739	402	365	168	164	725	181	750	752	760	249	248
K01740	848	777	390	399	1622	355	1803	1622	1597	294	1222
K01741	4644	3372	3803	357	1851	429	1627	1869	1809	359	145
K01743	0	0	0	0	0	0	0	0	0	0	0
K01744	1073	867	432	390	2192	418	1756	2226	2091	447	1268
K01745	859	813	386	412	1582	364	1831	1580	1680	270	1225
K01746	48	25	9	11	44	14	60	68	53	6	6
K01749	3969	5299	4770	1284	5989	1308	5711	6100	6288	1227	2131
K01750	2800	4289	4261	841	3657	870	3723	3675	4208	787	1241
K01751	0	0	0	0	0	0	0	0	0	0	0
K01752	725	715	353	365	1502	324	1714	1513	1442	192	1483
K01753	0	0	0	0	0	0	0	0	0	0	0
K01754	5254	2028	978	928	4253	907	4112	4269	4418	901	1753
K01755	4004	5329	4789	1308	6173	1347	5875	6252	6379	1222	2504
K01756	7316	5667	4923	1420	6759	1494	6410	6790	7135	1366	2566
K01757	0	0	0	0	0	0	0	0	0	0	0
K01758	91	83	33	39	184	50	201	198	191	35	196
K01759	2179	1961	999	976	4299	851	4211	4384	4408	745	2893
K01760	600	607	305	332	1321	290	1507	1321	1261	151	1369
K01761	384	428	214	236	872	182	955	883	1011	134	990
K01762	0	0	0	0	0	0	0	0	0	0	0
K01766	0	0	0	0	0	0	0	0	0	0	0
K01768	364	297	159	161	701	160	634	743	630	168	418
K01769	0	0	0	0	0	0	0	0	0	0	0
K01770	923	998	460	472	1937	424	2091	1988	2023	359	1777
K01771	0	0	0	0	0	0	0	0	0	0	0
K01772	842	851	415	423	1762	382	1909	1785	1650	290	1407
K01774	10	1	1	2	5	2	5	4	12	2	1
K01775	1347	1487	702	721	2901	625	3204	2930	3164	516	2884
K01776	1658	1493	718	693	3296	654	3065	3352	3248	603	2084
K01777	27	23	7	2	45	9	29	47	46	10	2
K01778	1911	1786	834	831	3528	848	3829	3482	4134	781	2306
K01779	91	104	45	26	182	33	190	193	189	38	114
K01780	0	0	0	0	0	0	0	0	0	0	0
K01781	22	18	2	4	14	2	17	16	24	2	2
K01782	372	387	193	228	794	177	831	800	944	208	711
K01783	1013	1066	491	507	2160	478	2324	2189	2186	375	2158
K01784	16253	12892	10562	3586	16514	3718	16033	16586	18364	3422	7593
K01785	846	791	410	432	1708	369	2000	1743	1461	172	1373
K01786	188	158	98	86	339	68	438	370	153	4	1
K01787	36	21	6	9	32	8	38	33	45	13	4
K01788	22	18	9	10	31	8	29	33	41	5	3
K01789	23	23	11	15	94	21	82	101	48	4	184
K01790	7416	5860	4978	1489	7101	1590	6772	7122	7686	1466	3320
K01791	3097	4640	4412	979	4444	1032	4484	4465	4780	893	2176
K01792	0	0	0	0	0	0	0	0	0	0	0
K01793	0	0	0	0	0	0	0	0	0	0	0
K01795	2008	1923	898	887	3869	915	4162	3858	4383	813	2788
K01796	60	37	6	12	43	7	46	42	72	7	7
K01797	0	0	0	0	0	0	0	0	0	0	0
K01798	0	0	0	0	0	0	0	0	0	0	0
K01799	242	224	86	85	338	100	399	334	469	138	37
K01800	0	0	0	0	0	0	0	0	0	0	0
K01801	0	0	0	0	0	0	0	0	0	0	0
K01802	11183	9087	6619	3174	13461	3098	14001	13399	15290	2737	6342
K01803	7344	5697	4931	1429	6793	1508	6475	6822	7205	1389	2572
K01804	206	175	107	93	375	75	472	404	198	11	5
K01805	278	230	147	129	550	109	650	596	289	18	189
K01807	6375	4670	4461	940	4707	1046	4221	4717	5110	1022	423
K01808	1123	1259	561	589	2582	576	2733	2612	2688	445	3084
K01809	1477	1276	622	548	2949	567	2598	3016	2631	521	1582
K01810	5281	2158	1003	953	4472	942	4301	4505	4665	896	2480
K01811	222	178	104	93	370	76	476	402	196	17	4
K01812	222	177	104	93	370	76	476	402	196	17	4
K01813	0	0	0	0	0	0	1	0	0	0	0
K01814	5353	6522	5360	1876	8476	1915	8393	8491	9403	1781	3647
K01815	188	159	98	86	339	69	439	370	154	4	1
K01816	364	406	189	191	849	184	934	892	768	84	937
K01817	3407	4957	4567	1115	5025	1175	5176	5056	5420	1046	2509
K01818	0	0	0	0	0	0	0	0	0	0	0
K01819	0	0	0	0	0	0	0	0	0	0	0
K01820	178	245	94	114	569	133	546	590	620	81	1116
K01821	1201	1002	498	472	2273	422	1911	2329	2281	475	838
K01822	22	18	9	10	31	7	29	33	41	5	3
K01823	6917	5184	4719	1236	5799	1290	5494	5795	6189	1141	1497
K01825	108	114	58	68	442	90	359	460	250	18	741
K01826	0	0	0	0	0	0	0	0	0	0	0
K01828	553	574	283	309	1138	250	1350	1176	1168	157	993
K01829	460	464	237	277	966	212	1125	997	955	105	876
K01834	12279	9973	6939	3344	15326	3518	15216	15295	17365	3349	6069
K01835	848	600	336	273	1590	273	1134	1637	1414	353	140
K01837	1	0	0	0	1	0	0	2	0	0	0
K01838	1003	796	379	357	1503	400	1630	1437	2101	426	162
K01839	1	0	1	0	1	0	2	0	0	0	0
K01840	16149	8191	6111	2511	12298	2589	11293	12347	12847	2326	5045
K01841	735	500	277	229	1348	217	953	1398	1197	238	115
K01842	73	54	29	29	209	49	205	169	139	12	377
K01843	2196	1796	892	842	3838	832	3630	3836	4340	888	1176
K01844	16	9	2	6	18	4	22	22	24	6	2
K01845	5933	6843	5544	1980	9838	2028	8811	10019	9969	1935	3901
K01846	31	18	4	6	20	4	24	20	36	4	4
K01847	825	803	423	418	1762	374	2027	1743	1633	213	1680
K01848	1148	862	426	369	1979	381	1588	2029	1965	497	185
K01849	1041	763	379	328	1752	331	1420	1808	1761	385	162
K01850	68	54	16	18	77	26	119	87	128	37	11
K01851	4	9	7	2	24	2	14	21	23	1	2
K01852	0	0	0	0	0	0	0	0	0	0	0
K01853	0	0	0	0	0	0	0	0	0	0	0
K01854	231	187	112	99	387	80	485	420	210	16	6
K01856	44	36	11	15	48	10	46	51	67	7	5
K01857	0	0	0	0	0	0	0	0	0	0	0
K01858	6436	4756	4478	954	4838	1070	4336	4844	5157	1041	610
K01860	439	535	238	292	1079	245	1160	1094	1361	177	1624
K01861	0	0	0	0	0	0	0	0	0	0	0
K01865	28	24	11	18	98	22	83	106	52	4	184
K01866	7344	5697	4932	1429	6793	1508	6475	6822	7205	1389	2572
K01867	7352	5698	4933	1430	6798	1509	6481	6826	7216	1391	2574
K01868	7344	5697	4932	1429	6793	1508	6475	6822	7205	1389	2572
K01869	7106	5419	4809	1288	6240	1358	5877	6265	6419	1228	1804
K01870	7344	5697	4932	1429	6793	1508	6475	6822	7205	1389	2572
K01872	7373	5716	4934	1435	6813	1511	6498	6842	7240	1393	2576
K01873	7344	5697	4932	1429	6793	1508	6475	6822	7205	1389	2572
K01874	7344	5697	4932	1429	6793	1508	6475	6822	7205	1389	2572
K01875	7344	5697	4932	1429	6793	1508	6475	6822	7205	1389	2572
K01876	8079	6197	5209	1658	8141	1725	7428	8220	8402	1627	2687
K01878	307	391	142	140	690	163	652	704	812	207	782
K01879	307	391	142	140	690	163	652	704	812	207	782
K01880	7036	5307	4790	1288	6103	1345	5823	6118	6394	1182	1790
K01881	7344	5697	4932	1429	6793	1508	6475	6822	7205	1389	2572
K01883	6398	4947	4579	1095	5385	1126	4919	5480	5216	974	2420
K01884	3238	296	118	104	514	130	478	470	683	124	57
K01885	7191	5547	4887	1371	6596	1437	6244	6638	6865	1282	2539
K01886	855	899	438	454	1895	419	2063	1900	1943	340	1952
K01887	7156	5525	4862	1353	6529	1431	6168	6562	6848	1284	2542
K01889	7344	5697	4932	1429	6793	1508	6475	6822	7205	1389	2572
K01890	7344	5697	4932	1429	6793	1508	6475	6822	7205	1389	2572
K01892	7344	5697	4932	1429	6797	1508	6476	6826	7207	1389	2572
K01893	8855	4583	4382	934	4299	1001	4207	4304	4374	856	1626
K01894	0	0	0	0	0	0	0	0	0	0	0
K01895	6467	7357	5683	2156	9800	2313	9852	9764	11373	2358	2907
K01896	14	10	1	5	14	4	22	31	21	3	3
K01897	1796	1816	827	875	3645	825	4016	3638	3789	700	3383
K01899	0	0	0	0	0	0	0	0	0	0	0
K01902	6321	4891	4557	1081	5283	1106	4833	5371	5103	948	2410
K01903	6321	4891	4557	1081	5283	1106	4833	5371	5103	948	2410
K01904	0	0	0	0	0	0	0	0	0	0	0
K01905	7696	3498	3858	392	2186	495	1824	2178	2128	367	350
K01906	73	94	18	16	84	16	90	88	80	18	10
K01907	187	172	70	75	263	77	307	259	357	105	30
K01908	0	0	0	0	0	0	0	0	0	0	0
K01909	189	288	90	94	458	106	468	464	596	88	756
K01910	0	0	0	0	0	0	0	0	0	0	0
K01911	691	658	345	356	1391	297	1595	1386	1348	169	1194
K01912	4705	5822	5010	1470	6762	1678	6937	6691	8046	1714	1616
K01913	0	0	0	0	0	0	0	0	0	0	0
K01914	43	20	6	8	32	8	37	33	43	13	4
K01915	9510	7444	5789	2215	10616	2345	10050	10662	11385	2250	3806
K01916	6723	5049	4633	1109	5578	1248	5070	5563	6007	1226	1573
K01917	0	0	0	0	0	0	0	0	0	0	0
K01918	995	1055	487	502	2144	472	2299	2162	2162	373	2155
K01919	0	0	0	0	0	0	0	0	0	0	0
K01920	22	18	10	10	32	8	29	33	42	5	3
K01921	996	1051	486	498	2084	459	2249	2100	2156	374	1974
K01922	2447	2087	1002	955	4375	962	4185	4396	5076	1008	1940
K01923	4080	5374	4805	1316	6247	1364	5935	6326	6453	1242	2509
K01924	937	1004	450	467	1979	440	2127	1981	2077	366	1971
K01925	1919	1792	836	823	3482	835	3788	3423	4124	785	2126
K01926	49	43	22	24	140	29	122	149	98	11	189
K01928	995	1055	487	502	2144	472	2299	2162	2162	373	2155
K01929	1023	1060	485	497	2094	462	2268	2105	2165	385	1976
K01930	859	879	429	464	1928	431	2053	1947	1936	325	2034
K01932	0	0	0	0	0	0	0	0	0	0	0
K01933	4058	5356	4803	1311	6233	1362	5918	6310	6429	1240	2507
K01934	5039	1831	857	821	3841	810	3632	3843	3923	790	1616
K01935	1587	1444	695	676	3158	620	2908	3261	3134	585	1887
K01937	7055	5385	4776	1235	6188	1374	5780	6215	6414	1289	1881
K01938	570	633	280	317	1190	265	1322	1227	1536	222	1560
K01939	7316	5667	4923	1420	6759	1494	6410	6790	7136	1366	2566
K01940	4006	5337	4795	1311	6191	1349	5887	6264	6401	1223	2508
K01941	22	18	2	4	14	2	17	16	24	2	2
K01945	4080	5373	4805	1316	6247	1364	5935	6325	6453	1242	2509
K01947	0	0	0	0	0	0	0	0	0	0	0
K01948	0	0	0	0	0	0	0	0	0	0	0
K01949	0	0	0	0	0	0	0	0	0	0	0
K01950	1864	1743	809	804	3339	800	3633	3331	3993	771	1927
K01951	10389	9939	9227	2216	10846	2364	10032	10963	11308	2172	3089
K01952	8852	11231	9831	2826	13581	2902	12564	13827	14007	2718	4667
K01953	5905	7068	5690	2225	10039	2094	9628	10224	10380	1871	5103
K01955	4171	5480	4847	1353	6378	1385	6104	6460	6552	1257	2519
K01956	4051	5350	4797	1315	6205	1354	5906	6279	6411	1232	2508
K01957	8	1	1	1	5	2	5	4	11	2	1
K01958	76	90	41	27	150	29	178	160	167	34	115
K01959	6332	4678	4458	911	4706	1015	4137	4720	4875	1018	412
K01960	4796	1819	773	722	3352	825	3428	3276	4233	853	1932
K01961	10664	4512	2169	2141	9579	1974	9302	9654	9896	1681	6148
K01962	939	1026	478	491	2101	460	2247	2117	2111	357	2150
K01963	939	1026	478	491	2101	460	2247	2117	2112	357	2150
K01965	64	80	38	24	138	24	160	146	143	28	112
K01966	1850	1589	820	819	3582	703	3434	3637	3582	627	2026
K01968	0	0	0	0	0	0	0	0	0	0	0
K01969	0	0	0	0	0	0	0	0	0	0	0
K01970	1113	919	483	462	2190	396	1892	2254	2184	371	1103
K01971	650	652	342	351	1371	292	1516	1422	1295	246	1008
K01972	1025	1073	490	508	2163	476	2321	2181	2198	377	2158
K01973	0	0	0	0	0	0	0	0	0	0	0
K01974	6260	4643	4444	925	4734	1043	4215	4745	5162	981	1131
K01975	6694	5068	4620	1092	5493	1220	4970	5527	5902	1221	1380
K01976	0	0	0	0	4	0	1	4	2	0	0
K01980	0	0	0	0	0	0	0	0	0	0	0
K01989	20	14	3	6	14	5	22	22	27	7	4
K01990	37588	22677	19519	5597	26030	6132	25768	25952	29276	5472	11386
K01991	1132	1220	579	608	2554	569	2733	2598	2703	446	2898
K01992	26842	14429	11225	4209	18602	4545	19404	18328	21966	4186	6583
K01993	604	569	265	268	1296	297	1354	1313	1131	240	1342
K01994	0	0	0	0	0	0	0	0	0	0	0
K01995	1661	3272	3786	340	1738	388	1550	1810	1541	384	131
K01996	1727	3337	3815	364	1840	417	1674	1909	1697	418	145
K01997	1652	3271	3785	338	1734	386	1544	1806	1531	382	130
K01998	1686	3298	3795	347	1770	392	1579	1838	1585	387	135
K01999	3338	4465	4451	884	4857	916	3848	5031	4348	1010	399
K02000	0	0	0	0	0	0	0	0	0	0	0
K02001	950	759	360	336	1432	384	1570	1364	2012	416	155
K02002	1023	826	399	366	1614	427	1702	1545	2158	522	173
K02003	18044	10587	7176	3718	16198	3835	16864	16108	18516	3477	10264
K02004	13585	11366	7743	4120	17990	4307	19115	17912	20183	4174	8088
K02005	1738	1771	875	892	3593	781	3928	3669	3598	642	2991
K02006	16388	10232	9232	2198	10334	2580	10231	10072	12701	2540	1713
K02007	3394	4778	4476	982	4608	1139	4577	4554	5540	1148	1146
K02008	9790	9496	8952	1958	9126	2274	9082	8955	11123	2240	1580
K02009	2149	3638	3976	510	2490	597	2363	2496	2724	526	207
K02010	463	478	243	259	905	187	1030	922	1097	146	816
K02011	176	168	89	66	302	54	337	320	308	46	125
K02012	136	141	70	58	306	62	308	321	292	45	306
K02013	9670	7529	5788	2242	9892	2498	10355	9660	12172	2567	2232
K02014	6240	6282	3076	3125	12755	2772	14334	12946	12260	2023	10727
K02015	10407	8100	6070	2500	11095	2809	11687	10753	13816	2780	2716
K02016	13581	10600	7292	3683	16223	4005	16775	15824	20204	4084	3874
K02017	1261	1152	505	480	2184	560	2274	2129	2834	622	1117
K02018	5816	4441	4292	804	3942	948	3794	3912	4459	908	1243
K02019	499	563	204	212	938	235	950	945	1164	311	813
K02020	2515	4089	4158	688	3346	796	3225	3371	3653	754	1178
K02021	25	18	9	12	34	8	29	36	43	5	3
K02022	541	521	266	303	1008	224	1171	1037	1083	128	708
K02023	7942	3792	3959	509	2628	616	2373	2637	2892	490	943
K02024	0	0	0	0	0	0	0	0	0	0	0
K02025	11577	4511	4319	787	4005	913	3632	3935	4459	752	1265
K02026	11584	4519	4327	789	4026	916	3646	3956	4481	753	1267
K02027	11392	4331	4205	714	3578	846	3266	3520	4079	727	1046
K02028	182	164	96	78	416	94	392	425	338	140	212
K02029	227	185	96	85	425	101	419	442	373	147	215
K02030	428	384	187	179	758	193	776	767	803	260	252
K02031	18495	7517	5710	2072	9891	2384	9571	9668	11996	2452	1161
K02032	21611	12196	10140	3092	14299	3443	14019	14092	17114	3494	3191
K02033	20271	10993	9611	2568	12128	2851	11585	11952	14138	2780	2143
K02034	19971	10679	9454	2372	11516	2716	10885	11340	13334	2678	1450
K02035	24621	12215	10217	3085	14521	3446	14031	14222	17169	3455	2384
K02036	7036	5403	4801	1310	6202	1359	5807	6259	6600	1241	2055
K02037	7036	5403	4801	1310	6198	1359	5806	6255	6598	1241	2055
K02038	7013	5380	4790	1295	6104	1338	5724	6154	6550	1237	1871
K02039	6752	5184	4653	1139	5788	1274	5219	5835	6242	1215	2292
K02040	8224	6370	5277	1750	8112	1855	7835	8126	9036	1812	2428
K02041	795	537	290	246	1404	230	1009	1454	1284	248	123
K02042	808	547	293	250	1416	235	1027	1469	1308	254	126
K02043	0	0	0	0	0	0	0	0	0	0	0
K02044	1781	1283	673	562	3170	544	2368	3283	2881	636	280
K02045	128	128	75	52	244	43	280	262	223	36	115
K02046	64	48	37	29	106	19	120	116	80	8	3
K02047	64	48	37	29	106	19	120	116	80	8	3
K02048	76	61	44	34	128	21	137	141	104	11	7
K02049	3834	5123	4743	1263	5916	1278	5475	6027	6170	1180	2382
K02050	3333	4542	4442	925	4629	996	4092	4700	4747	999	582
K02051	3273	4450	4420	877	4528	950	3948	4594	4519	927	556
K02052	4496	1328	603	554	2400	634	2574	2285	3265	690	258
K02053	437	468	221	244	852	185	985	858	1102	161	818
K02054	35	40	16	11	65	17	82	62	94	24	8
K02055	105	87	55	41	174	37	205	178	184	34	12
K02056	3612	640	264	238	1122	289	1082	1070	1406	379	124
K02057	8162	3922	4054	566	2939	684	2624	2922	3010	646	429
K02058	3343	383	166	141	672	162	672	630	853	155	69
K02059	1357	3036	3674	240	1298	286	1084	1377	1040	210	80
K02060	4636	3352	3798	352	1832	421	1587	1866	1764	339	141
K02061	4453	3190	3735	280	1590	346	1294	1624	1430	235	115
K02062	57	42	10	8	60	13	50	62	80	14	5
K02063	59	43	10	9	63	13	53	67	80	14	5
K02064	59	43	10	9	63	13	53	67	80	14	5
K02065	1338	1444	659	679	2942	660	3145	2995	2920	555	2920
K02066	1358	1457	662	684	2956	665	3167	3017	2948	562	2924
K02067	312	395	141	142	691	162	655	710	817	209	783
K02068	124	198	72	82	378	90	382	384	518	73	748
K02069	224	316	102	108	502	118	514	511	661	98	763
K02071	147	216	82	91	409	98	412	416	559	78	752
K02072	1	0	1	0	1	0	2	1	0	0	0
K02073	1	0	1	0	1	0	2	1	0	0	0
K02074	4274	1120	501	454	2038	543	2161	1923	2833	582	222
K02075	4361	1229	529	478	2151	566	2276	2036	2952	603	234
K02076	0	0	0	0	0	0	0	0	0	0	0
K02077	4496	1447	609	574	2626	676	2735	2523	3515	678	1166
K02078	2004	2097	1004	1032	4377	963	4765	4435	4241	712	4291
K02079	0	0	0	0	0	0	0	0	0	0	0
K02080	0	0	0	0	0	0	0	0	0	0	0
K02081	232	227	109	95	417	84	525	450	283	32	115
K02082	0	0	0	0	0	0	0	0	0	0	0
K02083	0	0	0	0	0	0	0	0	0	0	0
K02086	0	0	0	0	0	0	0	0	0	0	0
K02092	22	18	9	10	31	8	29	33	41	5	3
K02093	22	18	9	10	31	8	29	33	41	5	3
K02094	22	18	9	10	31	8	29	33	41	5	3
K02095	22	18	9	10	31	8	29	33	41	5	3
K02096	22	18	9	10	31	8	29	33	41	5	3
K02097	22	18	9	10	31	8	29	33	41	5	3
K02099	0	0	0	0	0	0	0	0	0	0	0
K02100	0	0	0	0	0	0	0	0	0	0	0
K02101	0	0	0	0	0	0	0	0	0	0	0
K02102	0	0	0	0	0	0	0	0	0	0	0
K02103	0	0	0	0	0	0	0	0	0	0	0
K02106	114	128	48	36	186	40	242	194	236	54	119
K02108	1119	1253	559	583	2521	562	2681	2545	2680	446	2903
K02109	1174	1248	556	562	2456	544	2567	2479	2454	507	2189
K02110	1978	1953	908	894	4248	869	4017	4327	4395	757	3766
K02111	1119	1255	559	585	2524	562	2683	2548	2681	446	2903
K02112	1119	1253	559	583	2522	562	2681	2546	2681	446	2903
K02113	870	857	415	420	1766	382	1916	1777	1644	300	1407
K02114	1119	1253	559	583	2522	562	2681	2546	2681	446	2903
K02115	1119	1253	559	583	2522	562	2681	2546	2681	446	2903
K02116	306	388	141	141	687	161	651	706	810	206	782
K02117	6474	4841	4517	1008	5028	1126	4560	5044	5562	1089	1166
K02118	6488	4848	4519	1013	5042	1130	4579	5060	5585	1095	1167
K02119	2898	4144	4247	738	3838	815	3328	3903	3934	764	324
K02120	6488	4848	4519	1013	5042	1130	4579	5060	5585	1095	1167
K02121	10541	5762	4939	1386	6784	1583	6374	6705	8001	1545	1355
K02122	3113	4346	4326	821	4135	906	3699	4194	4359	892	359
K02123	6301	4676	4449	938	4780	1053	4272	4802	5228	990	1137
K02124	6273	4653	4446	931	4753	1047	4238	4763	5185	987	1133
K02128	0	0	0	0	0	0	0	0	0	0	0
K02134	0	0	0	0	0	0	0	0	0	0	0
K02137	0	0	0	0	0	0	0	0	0	0	0
K02160	960	1043	478	495	2114	462	2262	2132	2136	359	2152
K02164	64	80	38	24	138	24	160	146	143	28	112
K02167	0	0	0	0	0	0	0	0	0	0	0
K02168	86	98	40	28	152	26	178	162	168	30	114
K02169	171	178	61	54	290	67	257	300	273	134	32
K02170	260	266	88	90	346	92	396	348	438	122	40
K02171	0	0	0	0	0	0	0	0	0	0	0
K02172	0	0	0	0	0	0	0	0	0	0	0
K02173	0	0	0	0	0	0	0	0	0	0	0
K02182	0	0	0	0	0	0	0	0	0	0	0
K02183	0	0	0	0	0	0	0	0	0	0	0
K02188	3186	4505	4391	903	4472	985	4026	4540	4811	942	1105
K02189	3030	4276	4308	806	4043	880	3583	4090	4222	860	351
K02190	13	10	3	4	12	5	18	14	24	5	3
K02191	3045	4291	4315	815	4074	887	3612	4132	4257	861	353
K02192	0	0	0	0	0	0	0	0	0	0	0
K02193	0	0	0	0	0	0	0	0	0	0	0
K02194	588	609	311	320	1227	266	1365	1256	1243	242	828
K02195	516	542	273	290	1047	223	1234	1075	1098	136	810
K02196	0	0	0	0	0	0	0	0	0	0	0
K02197	588	609	311	320	1227	266	1365	1256	1243	242	828
K02198	616	638	320	328	1261	280	1429	1288	1311	265	833
K02199	76	78	45	32	208	46	144	202	170	108	20
K02200	4	9	7	2	24	2	14	21	23	1	2
K02201	3085	4318	4317	814	4101	892	3636	4162	4293	869	355
K02203	104	74	59	44	164	27	204	188	105	13	4
K02204	0	0	0	0	0	0	0	0	0	0	0
K02205	0	0	0	0	0	0	0	0	0	0	0
K02217	2352	1905	969	905	4136	894	4086	4123	4512	817	1458
K02221	333	417	158	153	746	173	695	758	875	213	788
K02224	6667	7308	5712	2152	9772	2385	9788	9686	11789	2540	1657
K02225	0	0	0	0	0	0	0	0	0	0	0
K02226	0	0	0	0	0	0	0	0	0	0	0
K02227	3368	4656	4451	954	4761	1057	4286	4836	5117	1090	1134
K02228	0	0	0	0	0	0	0	0	0	0	0
K02229	0	0	0	0	0	0	0	0	0	0	0
K02230	6450	9123	8800	1851	8470	2126	8553	8343	10271	2043	1680
K02231	753	793	370	411	1559	359	1698	1607	1750	318	1477
K02232	3196	4485	4401	890	4540	977	4007	4628	4731	965	1100
K02233	3201	4496	4387	882	4516	983	3996	4594	4778	992	1106
K02234	22	18	9	10	31	8	29	33	41	5	3
K02236	0	0	0	0	0	0	0	0	0	0	0
K02237	282	378	139	131	682	157	634	685	791	201	780
K02238	791	787	384	386	1543	328	1682	1590	1480	277	1027
K02239	0	0	0	0	0	0	0	0	0	0	0
K02240	0	0	0	0	0	0	0	0	0	0	0
K02241	0	0	0	0	0	0	0	0	0	0	0
K02242	68	92	18	14	84	16	88	86	78	16	8
K02243	0	0	0	0	0	0	0	0	0	0	0
K02244	0	0	0	0	0	0	0	0	0	0	0
K02245	0	0	0	0	0	0	0	0	0	0	0
K02246	0	0	0	0	0	0	0	0	0	0	0
K02247	0	0	0	0	0	0	0	0	0	0	0
K02248	0	0	0	0	0	0	0	0	0	0	0
K02249	0	0	0	0	0	0	0	0	0	0	0
K02250	0	0	0	0	0	0	0	0	0	0	0
K02251	0	0	0	0	0	0	0	0	0	0	0
K02252	0	0	0	0	0	0	0	0	0	0	0
K02253	0	0	0	0	0	0	0	0	0	0	0
K02254	0	0	0	0	0	0	0	0	0	0	0
K02255	0	0	0	0	0	0	0	0	0	0	0
K02257	0	0	0	0	0	0	0	0	0	0	0
K02258	0	0	0	0	0	0	0	0	0	0	0
K02259	1359	1125	600	567	2609	480	2397	2700	2439	385	1113
K02262	0	0	0	0	0	0	0	0	0	0	0
K02266	0	0	0	0	0	0	0	0	0	0	0
K02274	1731	1534	766	746	3500	687	3235	3611	3415	610	2265
K02275	1684	1506	763	737	3473	685	3208	3586	3368	608	2261
K02276	1342	1430	695	745	3025	666	3278	3056	3194	504	3322
K02277	26	24	11	16	96	22	82	102	50	4	184
K02278	176	245	94	114	569	133	546	590	618	81	1116
K02279	102	99	56	49	301	66	227	306	218	111	204
K02280	247	312	132	144	749	176	677	771	764	187	1134
K02281	0	0	0	0	0	0	0	0	0	0	0
K02282	228	300	128	131	682	158	609	690	740	184	952
K02283	6058	4645	4386	933	4424	1094	4288	4404	5020	1074	1652
K02284	22	18	9	10	31	8	29	33	41	5	3
K02285	22	18	9	10	31	8	29	33	41	5	3
K02286	22	18	9	10	31	8	29	33	41	5	3
K02287	22	18	9	10	31	8	29	33	41	5	3
K02288	22	18	9	10	31	8	29	33	41	5	3
K02289	22	18	9	10	31	8	29	33	41	5	3
K02290	43	35	19	20	62	16	57	65	81	10	7
K02291	83	72	30	35	176	36	148	178	152	15	193
K02292	22	18	9	10	35	8	30	37	43	5	3
K02293	22	18	9	10	31	8	29	33	41	5	3
K02294	375	414	205	228	780	166	887	791	981	134	807
K02295	0	0	0	0	0	0	0	0	0	0	0
K02297	0	0	0	0	0	0	0	0	0	0	0
K02298	0	0	0	0	0	0	0	0	0	0	0
K02299	312	337	168	209	706	155	779	714	842	104	876
K02300	0	0	0	0	0	0	0	0	0	0	0
K02301	2400	1903	998	914	4449	836	3877	4600	4233	860	1284
K02302	178	148	88	74	334	75	300	351	294	126	29
K02303	3978	5309	4772	1291	5995	1314	5729	6114	6307	1231	2132
K02304	5784	6596	5412	1852	8713	1926	8217	8788	9504	2048	1528
K02305	64	80	38	24	138	24	160	146	143	28	112
K02312	0	0	0	0	0	0	0	0	0	0	0
K02313	1119	1253	559	583	2521	562	2681	2545	2680	446	2903
K02314	1587	1688	800	895	3370	743	3709	3392	3768	579	3540
K02315	189	288	90	94	458	106	468	464	596	88	756
K02316	4259	1379	614	615	2690	616	2839	2659	2914	520	2218
K02317	0	0	0	0	0	0	0	0	0	0	0
K02319	14249	8327	8370	1398	7018	1604	6338	7017	7575	1515	624
K02322	2898	4144	4247	738	3838	815	3328	3903	3934	764	324
K02323	2898	4144	4247	738	3838	815	3328	3903	3934	764	324
K02330	23	23	11	15	94	21	82	101	48	4	184
K02334	6756	5117	4641	1111	5564	1236	5033	5586	6005	1235	1390
K02335	1060	1145	505	515	2225	488	2384	2242	2240	388	2164
K02336	0	0	0	0	0	0	0	0	0	0	0
K02337	1252	1307	617	618	2680	583	2921	2739	2516	412	2455
K02338	892	875	425	431	1798	389	1946	1811	1685	305	1410
K02339	0	0	0	0	0	0	0	0	0	0	0
K02340	870	857	415	420	1766	382	1916	1777	1644	300	1407
K02341	982	1045	484	498	2132	467	2281	2148	2138	368	2152
K02342	1653	1737	798	821	3416	747	3787	3425	3473	547	3172
K02343	995	1055	487	502	2145	472	2299	2163	2163	373	2155
K02344	0	0	0	0	0	0	0	0	0	0	0
K02345	0	0	0	0	0	0	0	0	0	0	0
K02346	975	1018	492	501	2150	472	2336	2177	2178	382	2254
K02347	1464	1303	606	595	2368	575	2640	2321	3117	572	972
K02348	54	53	28	28	206	48	205	167	139	12	377
K02351	0	0	0	0	1	0	0	2	0	0	0
K02352	0	0	0	0	0	0	0	0	0	0	0
K02355	1531	1597	746	761	3354	744	3534	3427	3222	594	3305
K02356	995	1055	487	502	2144	472	2299	2162	2162	373	2155
K02357	994	1055	487	501	2143	472	2298	2160	2162	373	2155
K02358	1217	1347	608	622	2746	613	2850	2771	2878	560	2928
K02361	615	600	299	323	1255	274	1456	1246	1234	158	1186
K02362	0	0	0	0	0	0	0	0	0	0	0
K02363	0	0	0	0	0	0	0	0	0	0	0
K02364	0	0	0	0	0	0	0	0	0	0	0
K02371	81	63	31	34	230	54	231	194	168	18	379
K02372	1150	1365	594	651	2808	634	2898	2891	3022	475	3709
K02377	844	889	403	432	1681	376	1834	1724	1811	327	1479
K02379	2249	3766	4024	555	2708	636	2602	2734	2850	538	401
K02380	84	84	45	36	210	46	150	210	175	110	22
K02381	0	0	0	0	4	0	1	4	2	0	0
K02382	0	0	0	0	0	0	0	0	0	0	0
K02383	0	0	0	0	0	0	0	0	0	0	0
K02384	0	0	0	0	0	0	0	0	0	0	0
K02385	30	25	12	17	104	22	88	113	54	4	184
K02386	160	175	60	50	282	64	240	288	252	129	30
K02387	353	426	171	166	834	187	798	861	862	209	963
K02388	354	426	171	166	835	187	798	863	862	209	963
K02389	354	426	171	166	835	187	798	863	862	209	963
K02390	478	624	243	247	1212	277	1180	1246	1380	282	1711
K02391	28	25	12	17	99	22	85	109	52	4	184
K02392	706	853	342	332	1669	374	1595	1725	1724	418	1925
K02393	352	426	170	166	829	187	795	857	860	209	962
K02394	352	426	170	166	830	187	796	858	860	209	962
K02395	212	297	92	100	474	110	487	481	620	94	758
K02396	230	228	99	85	458	97	416	480	344	136	215
K02397	315	394	157	146	726	161	698	745	788	200	776
K02398	96	84	42	36	205	49	157	212	177	114	22
K02399	0	0	0	0	0	0	0	0	0	0	0
K02400	354	426	171	166	835	187	798	863	862	209	963
K02401	354	426	171	166	835	187	798	863	862	209	963
K02402	0	0	0	0	0	0	0	0	0	0	0
K02403	0	0	0	0	0	0	0	0	0	0	0
K02404	230	228	99	85	458	97	416	480	344	136	215
K02405	418	517	189	180	916	203	884	943	940	224	971
K02406	662	774	344	322	1572	353	1530	1625	1654	404	1735
K02407	206	206	88	70	364	76	334	379	296	132	31
K02408	478	624	243	247	1212	277	1180	1246	1380	282	1711
K02409	328	403	160	150	738	166	716	759	812	205	779
K02410	354	426	171	166	835	187	798	863	862	209	963
K02411	140	115	70	56	282	61	249	298	218	116	22
K02412	354	426	171	166	835	187	798	863	862	209	963
K02413	222	282	114	118	577	139	536	591	694	186	770
K02414	12	10	3	4	16	5	18	18	26	5	3
K02415	204	205	88	68	362	76	334	376	294	132	31
K02416	354	426	171	166	835	187	798	863	862	209	963
K02417	304	328	120	100	549	117	519	571	443	156	226
K02418	2	2	0	0	2	0	2	5	1	0	0
K02419	354	426	171	166	835	187	798	863	862	209	963
K02420	354	426	171	166	835	187	798	863	862	209	963
K02421	353	426	171	166	834	187	798	861	862	209	963
K02422	354	426	171	166	835	187	798	863	862	209	963
K02423	0	0	0	0	0	0	0	0	0	0	0
K02424	0	0	0	0	0	0	0	0	0	0	0
K02425	0	0	0	0	0	0	0	0	0	0	0
K02426	703	672	348	368	1460	315	1661	1468	1368	170	1374
K02427	2883	4131	4243	739	3809	811	3317	3874	3914	759	325
K02428	965	1022	469	483	2023	448	2202	2037	2089	368	1969
K02429	774	702	367	394	1493	327	1775	1509	1293	147	1079
K02430	0	0	0	0	0	0	0	0	0	0	0
K02431	3	0	0	2	2	0	0	3	2	0	0
K02433	7886	10561	9562	2548	12096	2606	11345	12295	12639	2503	4454
K02434	6247	7278	5728	2183	10183	2202	9700	10305	11088	2146	4150
K02435	6205	7247	5700	2163	10108	2191	9608	10222	11047	2143	4149
K02436	0	0	0	0	0	0	0	0	0	0	0
K02437	4472	1642	709	720	3236	741	3362	3232	3565	608	3154
K02438	254	320	138	142	714	166	640	726	781	190	956
K02439	0	0	0	0	0	0	0	0	0	0	0
K02440	1184	1071	484	460	2062	523	2213	2014	2739	525	1200
K02441	26	24	11	16	96	22	82	104	50	4	184
K02442	0	0	0	0	0	0	0	0	0	0	0
K02443	4	2	1	0	4	1	4	5	1	0	0
K02444	42	30	28	19	75	11	91	83	39	3	0
K02445	6	6	2	3	11	2	12	11	8	1	1
K02446	87	81	46	35	210	46	153	216	172	109	22
K02448	64	80	38	24	138	24	160	146	143	28	112
K02450	231	230	98	85	450	96	414	476	342	138	216
K02451	0	0	0	0	0	0	0	0	0	0	0
K02452	12	10	3	4	12	5	18	14	24	5	3
K02453	202	166	108	90	443	92	416	472	302	124	206
K02454	331	367	181	173	828	183	800	864	825	197	954
K02455	285	334	152	152	746	171	708	773	782	194	954
K02456	406	423	220	208	996	215	980	1053	913	206	1139
K02457	42	30	28	19	75	11	91	83	39	3	0
K02458	0	0	0	0	0	0	0	0	0	0	0
K02459	0	0	0	0	0	0	0	0	0	0	0
K02460	54	40	31	22	87	16	108	96	63	8	3
K02461	0	0	0	0	0	0	0	0	0	0	0
K02462	0	0	0	0	0	0	0	0	0	0	0
K02463	0	0	0	0	0	0	0	0	0	0	0
K02464	0	0	0	0	0	0	0	0	0	0	0
K02465	0	0	0	0	0	0	0	0	0	0	0
K02466	0	0	0	0	0	0	0	0	0	0	0
K02467	0	0	0	0	0	0	0	0	0	0	0
K02468	0	0	0	0	0	0	0	0	0	0	0
K02469	2017	1862	863	860	3647	874	3946	3611	4277	801	2319
K02470	2019	1867	865	865	3710	887	4000	3679	4284	800	2500
K02471	22	18	9	10	31	8	29	33	41	5	3
K02472	1212	2887	3610	174	1057	212	801	1132	721	113	53
K02473	0	0	0	0	0	0	0	0	0	0	0
K02474	679	695	313	339	1331	287	1539	1330	1326	169	1196
K02475	0	0	0	0	0	0	0	0	0	0	0
K02476	12	10	3	4	12	5	18	14	24	5	3
K02477	3148	3192	1632	1684	6441	1374	7439	6565	6182	928	4827
K02478	0	0	0	0	0	0	0	0	0	0	0
K02479	208	216	127	88	476	91	439	485	416	145	138
K02480	22	18	9	10	31	7	29	33	41	5	3
K02481	1166	1585	614	671	3296	768	3179	3378	3805	700	5456
K02482	80	74	38	32	186	44	134	190	150	108	19
K02483	839	991	404	426	1795	390	1817	1826	1959	351	1864
K02484	136	148	47	39	198	38	181	194	202	32	20
K02485	2949	4463	4397	990	4456	883	4107	4619	4392	660	2425
K02486	22	18	9	10	31	7	29	33	41	5	3
K02487	30	22	9	12	33	8	33	41	44	7	4
K02488	152	134	69	64	291	72	236	298	294	126	31
K02489	86	98	47	34	168	31	189	179	184	34	115
K02490	12	10	3	4	12	5	18	14	24	5	3
K02491	0	0	0	0	0	0	0	0	0	0	0
K02492	4759	5850	5073	1540	7540	1574	6869	7663	7621	1477	2622
K02493	995	1055	487	502	2144	472	2298	2162	2162	373	2155
K02494	0	0	0	0	0	0	0	0	0	0	0
K02495	1702	1764	828	853	3477	755	3836	3538	3470	543	3160
K02496	0	0	0	0	0	0	0	0	0	0	0
K02497	0	0	0	0	0	0	0	0	0	0	0
K02498	42	30	28	19	75	11	91	83	39	3	0
K02499	90	113	29	22	121	23	123	123	128	24	15
K02500	4973	6105	5156	1642	7635	1736	7454	7633	8417	1648	2659
K02501	4023	5346	4796	1306	6202	1352	5884	6269	6405	1231	2504
K02502	127	141	38	29	166	38	161	170	186	36	17
K02503	4645	5650	4982	1452	7139	1485	6452	7246	7124	1417	1881
K02504	0	0	0	0	0	0	0	0	0	0	0
K02505	0	0	0	0	0	0	0	0	0	0	0
K02506	0	0	0	0	0	0	0	0	0	0	0
K02507	0	0	0	0	0	0	0	0	0	0	0
K02508	0	0	0	0	0	0	0	0	0	0	0
K02509	0	0	0	0	4	0	1	4	2	0	0
K02510	210	272	104	123	618	139	584	635	680	86	1122
K02511	0	0	0	0	0	0	0	0	0	0	0
K02517	1115	1162	546	558	2374	521	2612	2411	2234	369	2152
K02518	972	1032	476	487	2050	451	2217	2061	2114	369	1971
K02519	995	1054	487	502	2144	472	2298	2161	2162	373	2155
K02520	1016	1073	497	512	2175	479	2328	2194	2203	378	2158
K02521	0	0	0	0	0	0	0	0	0	0	0
K02523	2705	2336	1126	1074	4948	1078	4853	4958	5413	1031	2429
K02525	0	0	0	0	0	0	0	0	0	0	0
K02526	0	0	0	0	0	0	0	0	0	0	0
K02527	967	1027	470	489	2086	461	2253	2103	2098	367	2149
K02528	7344	5697	4932	1429	6793	1508	6475	6822	7205	1389	2572
K02529	2420	2359	1299	1197	5410	1119	5849	5654	4308	678	4622
K02530	0	0	0	0	0	0	0	0	0	0	0
K02531	0	0	0	0	0	0	0	0	0	0	0
K02532	0	0	0	0	0	0	0	0	0	0	0
K02533	115	101	50	46	228	56	181	236	215	118	25
K02535	988	1044	480	499	2117	469	2282	2136	2138	372	2153
K02536	1143	1263	556	585	2514	562	2683	2539	2684	447	2903
K02538	0	0	0	0	0	0	0	0	0	0	0
K02545	0	0	0	0	0	0	0	0	0	0	0
K02546	0	0	0	0	0	0	0	0	0	0	0
K02547	0	0	0	0	0	0	0	0	0	0	0
K02548	1999	1760	895	890	3797	757	3765	3858	3907	645	2150
K02549	165	120	65	54	220	51	266	235	239	49	18
K02550	0	0	0	0	0	0	0	0	0	0	0
K02551	424	362	191	167	800	166	917	795	581	71	504
K02552	97	75	47	38	150	25	156	156	138	13	9
K02553	0	0	0	0	0	0	0	0	0	0	0
K02554	22	18	2	4	14	2	17	16	24	2	2
K02556	434	500	209	198	1020	231	933	1052	1012	318	982
K02557	1174	1302	582	603	2660	596	2774	2689	2773	548	2916
K02558	604	604	318	332	1288	274	1499	1289	1225	145	1182
K02560	0	0	0	0	0	0	0	0	0	0	0
K02562	0	0	0	0	0	0	0	0	0	0	0
K02563	1705	1532	753	715	3394	668	3169	3455	3308	607	2086
K02564	510	517	247	257	1273	285	1336	1290	1030	119	1685
K02565	0	0	0	0	0	0	0	0	0	0	0
K02566	220	206	88	94	386	102	406	389	432	110	216
K02567	136	208	75	84	389	95	400	396	542	78	751
K02568	0	0	0	0	0	0	0	0	0	0	0
K02569	0	0	0	0	0	0	0	0	0	0	0
K02570	0	0	0	0	0	0	0	0	0	0	0
K02571	0	0	0	0	0	0	0	0	0	0	0
K02572	0	0	0	0	0	0	0	0	0	0	0
K02573	136	208	75	84	389	95	400	396	542	78	751
K02574	78	100	21	17	94	20	103	94	102	20	12
K02575	463	503	227	222	960	236	970	971	1145	298	805
K02584	296	342	154	156	758	174	727	786	802	200	956
K02585	1035	820	400	370	1554	407	1712	1502	2119	432	162
K02586	1049	828	402	376	1568	411	1731	1519	2142	438	164
K02587	84	61	40	34	120	23	141	137	107	15	7
K02588	3148	4425	4362	873	3985	992	4037	3937	4781	949	366
K02589	972	771	362	343	1450	388	1593	1388	2038	424	158
K02590	972	771	362	343	1450	388	1593	1388	2038	424	158
K02591	1048	828	402	376	1568	411	1731	1517	2142	438	164
K02592	34	27	12	14	43	12	46	46	65	10	6
K02593	34	27	12	14	43	12	46	46	65	10	6
K02594	84	61	40	34	120	23	141	137	107	15	7
K02595	22	18	9	10	31	7	29	33	41	5	3
K02596	42	31	12	16	45	12	50	54	68	12	7
K02597	34	27	12	14	43	12	46	46	65	10	6
K02598	124	198	72	81	377	90	382	383	518	73	748
K02600	7344	5697	4932	1429	6793	1508	6475	6822	7205	1389	2572
K02601	7344	5697	4932	1429	6793	1508	6475	6822	7205	1389	2572
K02609	94	100	41	29	158	28	183	166	180	32	115
K02610	72	82	40	25	144	26	166	150	155	30	113
K02611	72	82	40	25	144	26	166	150	155	30	113
K02612	86	98	40	28	152	26	178	162	168	30	114
K02613	562	575	291	313	1214	263	1408	1206	1188	142	1182
[truncated: 4,886 more rows]

## Sheet: Nitrogen metabolism genes
#NAME	K1	K2	K3	MS1	MS2	MS3	Q1	Q2	Q3	S1	S2
K02586: nitrogenase molybdenum-iron protein alpha chain (nifD1) [EC: 1.18.6.1]	1049	828	402	376	1568	411	1731	1519	2142	438	164
K02591: nitrogenase molybdenum-iron protein beta chain (nifK) [EC: 1.18.6.1]	1048	828	402	376	1568	411	1731	1517	2142	438	164
K02588: nitrogenase iron protein (nifH)	3148	4425	4362	873	3985	992	4037	3937	4781	949	366
K00370: nitrate reductase / nitrite oxidoreductase, alpha subunit (narG) [EC: 1.7.5.1 1.7.99]	300	305	100	102	392	112	478	393	530	150	48
K00371: nitrate reductase / nitrite oxidoreductase, beta subunit (narH) [EC: 1.7.5.1 1.7.99]	433	504	173	185	774	203	865	780	1058	225	797
K00373: nitrate reductase molybdenum cofactor assembly chaperone (narJ)	40	38	12	12	46	19	82	46	92	28	8
K00374: nitrate reductase gamma subunit (narI) [EC: 1.7.5.1 1.7.99]	200	182	73	78	275	82	324	272	381	110	33
K00372: assimilatory nitrate reductase catalytic subunit (nasA) [EC: 1.7.99]	98	72	42	41	191	36	196	206	125	11	187
K00360: assimilatory nitrate reductase electron transfer subunit (nasB) [EC: 1.7.99]	4	9	7	2	20	2	13	17	21	1	2
K02567: nitrate reductase (cytochrome) (napA) [EC: 1.9.6.1]	136	208	75	84	389	95	400	396	542	78	751
K02568: nitrate reductase (cytochrome), electron transfer subunit (napB)	0	0	0	0	0	0	0	0	0	0	0
K02569: cytochrome c-type protein (napC)	0	0	0	0	0	0	0	0	0	0	0
K00362: nitrite reductase (NADH) large subunit (nirB) [EC: 1.7.1.15]	118	100	57	52	306	62	284	331	182	21	370
K00363: nitrite reductase (NADH) small subunit (nirD) [EC: 1.7.1.15]	982	830	409	368	2055	374	1664	2140	1962	350	1344
K00366: ferredoxin-nitrite reductase (nirA) [EC: 1.7.7.1]	1074	784	398	353	1794	325	1455	1847	1752	362	159
K00368: nitrite reductase (nirK) [EC: 1.7.2.1]	80	86	40	27	146	26	170	158	158	32	114
K03385: nitrite reductase (cytochrome c-552) (nrfA) [EC: 1.7.2.2]	158	129	71	49	236	40	276	258	207	43	115
K04561: nitric oxide reductase subunit B (norB) [EC: 1.7.2.5]	325	344	127	114	488	119	559	490	589	151	152
K02305: nitric oxide reductase subunit C (norC) [EC: 1.7.99.7]	64	80	38	24	138	24	160	146	143	28	112
K00376: nitrous-oxide reductase (nosZ) [EC: 1.7.2.4]	106	111	66	42	216	35	252	234	184	32	112
K02575: MFS transporter, NNP family, nitrate/nitrite transporter (NRT, narK, nrtP, nasA)	463	503	227	222	960	236	970	971	1145	298	805
K00367: ferredoxin-nitrate reductase (narB) [EC: 1.7.7.2]	22	18	9	10	31	8	29	33	41	5	3
K01501: nitrilase (BGL_1c01330) [EC: 3.5.5.1]	353	394	194	218	744	157	856	753	937	128	804
K00459: nitronate monooxygenase (npd) [EC: 1.13.12.16]	627	639	312	327	1222	266	1366	1252	1192	231	722

## Sheet: Antibiotic resistance genes
	K1	K2	K3	MS1	MS2	MS3	Q1	Q2	Q3	S1	S2
K07258: serine-type D-Ala-D-Ala carboxypeptidase (penicillin-binding protein 5/6) (dacC, dacA)	82	70	39	32	192	43	140	198	153	108	20
K07259: serine-type D-Ala-D-Ala carboxypeptidase/endopeptidase (penicillin-binding protein 4) (dacB)	1719	1853	820	895	3569	805	3898	3624	3857	595	3622
K05366: penicillin-binding protein 1A (mrcA)	2505	2503	1187	1274	4883	1068	5473	4916	5037	844	3951
K03587: penicillin-binding protein 3 (ftsI)	969	1032	476	486	2049	451	2215	2060	2113	369	1971
K05515: penicillin-binding protein 2 (mrdA)	973	1040	483	488	2072	453	2230	2079	2135	370	1974
K05367: penicillin-binding protein 1C (pbpC)	363	396	195	218	748	158	859	758	940	129	804
K08384: stage V sporulation protein D (spoVD)	2	0	1	0	2	0	2	2	1	0	0
K05365: penicillin-binding protein 1B (mrcB)	80	74	38	32	186	44	134	190	150	108	19
K01434: penicillin G amidase (pga-2)	667	678	325	347	1354	298	1515	1391	1364	267	1015
K07337: penicillin-binding protein activator (IpoB)	455	541	255	294	1058	234	1169	1073	1349	176	1440
K01467: beta-lactamase class C (ampC)	1584	1562	783	881	3035	691	3498	3094	3373	561	2143
K07576: metallo-beta-lactamase family protein (PSCI_0340)	1025	1216	540	551	2337	510	2522	2409	2546	435	2624
K08218: MFS transporter, PAT family, beta-lactamase induction signal transducer (ampG)	329	234	126	118	459	98	565	492	283	40	14
K05685: macrolide transport system ATP-binding/permease protein (macA)	191	251	111	116	546	122	555	567	606	80	932
K06979: macrolide phosphotransferase (mph)	34	28	10	8	40	6	35	36	56	5	6
K08217: MFS transporter, DHA3 family, macrolide efflux protein (ykuC)	26	27	16	12	52	10	42	50	62	6	6
K13888: membrane fusion protein, macrolide-specific efflux system (macA)	12	10	3	4	12	5	18	14	24	5	3
K01000: phospho-N-acetylmuramoyl-pentapeptide-transferase (mraY)	970	1032	476	486	2050	451	2217	2061	2113	369	1971
K01775: alanine racemase (alr)	1347	1487	702	721	2901	625	3204	2930	3164	516	2884
K01921: D-alanine-D-alanine ligase (ddl)	996	1051	486	498	2084	459	2249	2100	2156	374	1974
K01929: UDP-N-acetylmuramoyl-tripeptide--D-alanyl-D-alanine ligase (murF)	1023	1060	485	497	2094	462	2268	2105	2165	385	1976
K02563: UDP-N-acetylglucosamine--N-acetylmuramyl-(pentapeptide) pyrophosphoryl-undecaprenol N-acetylglucosamine transferase (murG)	1705	1532	753	715	3394	668	3169	3455	3308	607	2086
K07260: zinc D-Ala-D-Ala carboxypeptidase (vanY)	22	18	10	10	32	8	29	33	42	5	3
K08641: zinc D-Ala-D-Ala dipeptidase (vanX)	275	242	123	104	456	94	558	487	322	44	118
K07694: vancomycin resistance associated response regulator (vraR)	23	23	11	15	94	21	82	101	48	4	184
K03446: MFS transporter, DHA2 family, multidrug resistance protein (emrB)	316	318	138	128	632	138	654	667	397	129	212
K08170: MFS transporter, DHA2 family, multidrug resistance protein (norB)	5	6	2	3	10	2	11	10	8	1	1
K08223: MFS transporter, FSR family, fosmidomycin resistance protein (fsr)	206	265	120	119	583	126	576	604	636	82	934
K08225: MFS transporter, ENTS family, enterobactin (siderophore) exporter (entS)	4	9	7	2	24	2	14	21	23	1	2
K07552: MFS transporter, DHA1 family, multidrug resistance protein (bcr, tcaB)	1152	926	465	425	1799	455	2023	1757	2191	422	158
K00662: aminoglycoside 3-N-acetyltransferase (aacC)	735	500	277	229	1348	218	953	1398	1197	238	115
K03297: small multidrug resistance pump (emrE, qac, mmr, smr)	34	24	11	16	94	21	82	102	50	4	184
K03327: multidrug resistance protein, MATE family (TC.MATE, SLC47A, norM, mdtK, dinF)	811	761	392	406	1671	367	1825	1678	1551	284	1396
K09771: small multidrug resistance family-3 protein (TC.SMR3)	923	779	387	334	1862	331	1496	1927	1859	340	975
K05595: multiple antibiotic resistance protein (marC)	7073	5684	4892	1472	6351	1508	6581	6351	7152	1357	3172

## Sheet: Toxins and Proinflammatory gene
	K1	K2	K3	MS1	MS2	MS3	Q1	Q2	Q3	S1	S2
K06861: lipopolysaccharide export system ATP-binding protein (lptB)	997	1052	481	502	2131	474	2303	2164	2157	373	2155		lipopolysaccharide export system ATP-binding protein		lptB
K07091: lipopolysaccharide export system permease protein (lptF)	65	90	18	14	82	16	86	80	78	16	8
K07271: lipopolysaccharide cholinephosphotransferase (licD) [EC:2.7.8.-]	59	31	11	8	46	10	48	42	47	17	5			[EC:2.7.8.-]
K09690: lipopolysaccharide transport system permease protein (ABC-2.LPSE.P)	995	1129	542	558	2289	505	2453	2361	2487	410	2516
K09691: lipopolysaccharide transport system ATP-binding protein (ABC-2.LPSE.A)	1934	1877	898	883	3648	870	3958	3648	4473	826	2490
K11720: lipopolysaccharide export system permease protein (lptG)	86	104	21	19	96	20	107	102	104	22	12
K02406: flagellin (fliC)	662	774	344	322	1572	353	1530	1625	1654	404	1735		flagellin		fliC
K02517: Kdo2-lipid IVA lauroyltransferase/acyltransferase (IpxL) [EC:2.3.1.241 2.3.1.-]	1115	1162	546	558	2374	521	2612	2411	2234	369	2152		Kdo2-lipid IVA lauroyltransferase/acyltransferase	2.3.1.241 2.3.1.	lpxL
K00748: lipid-A-disaccharide synthase (IpxB) [EC:2.4.1.182]	1010	1062	489	509	2148	477	2311	2168	2179	377	2156		lipid-A-disaccharide synthase	2.4.1.182	lpxB
K11693: peptidoglycan pentaglycine glycine transferase (femX, fmhB) [EC:2.3.2.16]	0	0	0	0	0	0	0	0	0	0	0		peptidoglycan pentaglycine glycine transferase	EC:2.3.2.16	femX, fmhB;
K11694: peptidoglycan pentaglycine glycine transferase (femA) [EC:2.3.2.17]	0	0	0	0	0	0	0	0	0	0	0		peptidoglycan pentaglycine glycine transferase (the second and third glycine)	EC:2.3.2.17	femA
